# Supplementary material for: A new supramolecular bonding motif involving NH bonds of ammonium salts and macrocycles derived from platinum corners and butadiynediyl linkers
Source: Royal Society of Chemistry journal article supplement (doi:10.1039/d2dt02680e), 2022-01-01
Supplement: d2dt02680e1.pdf [file d2dt02680e1.pdf]

ELECTRONIC SUPPLEMENTARY INFORMATION

for

A New Supramolecular Bonding Motif Involving NH bonds of Ammonium Salts  
and Macrocycles Derived from Platinum Corners and Butadiynediyl Linkers

**Brenna K. Collins, Nattamai Bhuvanesh, and John A. Gladysz\***

<sup>a</sup>Department of Chemistry, Texas A&M University, PO Box 30012, College Station, Texas

77842-3012, USA E-mail: [gladysz@mail.chem.tamu.edu](mailto:gladysz@mail.chem.tamu.edu)

## Experimental

**General.** Reactions were carried out under inert atmospheres and workups were conducted in air. Most instrumental procedures and chemical sources were detailed in a previous paper.<sup>s1</sup> The following were new to this study and used as received: HNEt<sub>2</sub> (99+%, Alfa Aesar), NEt<sub>3</sub> (>99+%, EMD), Diallylamine (99%, Sigma Aldrich), Morpholine (99%, Alfa Aesar), KI (>99%, Baker). The cryoprobe <sup>13</sup>C{<sup>1</sup>H} NMR and ESI and APCI mass spectra were recorded using 500 MHz Bruker Avance and Thermo Scientific Q Exactive Focus instruments.

**(Me<sub>2</sub>C(CH<sub>2</sub>PPh<sub>2</sub>)<sub>2</sub>)PtCl<sub>2</sub>.**<sup>s1,s2</sup> A Schlenk flask was charged with (THT)<sub>2</sub>PtCl<sub>2</sub> (1.0196 g, 2.3051 mmol), Me<sub>2</sub>C(CH<sub>2</sub>PPh<sub>2</sub>)<sub>2</sub> (1.22 g, 2.766 mmol), and CH<sub>2</sub>Cl<sub>2</sub> (20 mL) with stirring. After 24 h, the solvent was removed by rotary evaporation. The residue was washed with Et<sub>2</sub>O (150 mL), H<sub>2</sub>O (100 mL), and hexanes (100 mL), and dried by oil pump vacuum to give the product as a white solid (1.5644 g, 2.2143 mmol, 96%).

**(Et<sub>2</sub>C(CH<sub>2</sub>PPh<sub>2</sub>)<sub>2</sub>)PtCl<sub>2</sub>.**<sup>s1,s2</sup> A Schlenk flask was charged with (THT)<sub>2</sub>PtCl<sub>2</sub> (0.5000 g, 1.1304 mmol), Et<sub>2</sub>C(CH<sub>2</sub>PPh<sub>2</sub>)<sub>2</sub> (0.583 g, 1.243 mmol), and CH<sub>2</sub>Cl<sub>2</sub> (20 mL) with stirring. After 24 h, the solvent was removed by rotary evaporation. The residue was washed with Et<sub>2</sub>O (150 mL), H<sub>2</sub>O (100 mL), and hexanes (150 mL), and dried by oil pump vacuum to give the product as a white solid (0.798 g, 1.086 mmol, 96%).

**(Me<sub>2</sub>C(CH<sub>2</sub>PPh<sub>2</sub>)<sub>2</sub>)PtI<sub>2</sub>.** A round-bottom flask was charged with (Me<sub>2</sub>C(CH<sub>2</sub>PPh<sub>2</sub>)<sub>2</sub>)PtCl<sub>2</sub> (0.1004 g, 0.1421 mmol), KI (0.0795 g, 0.4789 mmol), and CH<sub>2</sub>Cl<sub>2</sub> (15 mL) with stirring. After 48 h, the solvent was removed by rotary evaporation. The residue was washed with H<sub>2</sub>O (3 x 30 mL) and Et<sub>2</sub>O (3 x 30 mL) and dried by oil pump vacuum (3 h) to give (Me<sub>2</sub>C(CH<sub>2</sub>PPh<sub>2</sub>)<sub>2</sub>)PtI<sub>2</sub> as a bright yellow solid (0.1138 g, 0.1280 mmol, 90%) that darkened at 370 °C and blackened at 397 °C. Anal. Calcd. for C<sub>29</sub>H<sub>30</sub>I<sub>2</sub>P<sub>2</sub>Pt (889.40): C, 39.16; H, 3.40; Found: C, 40.98; H, 3.55.

NMR (δ (ppm), CD<sub>2</sub>Cl<sub>2</sub>): <sup>1</sup>H (500 MHz) 7.96-7.89 (m, 8H, *m* to P), 7.54-7.49 (m, 12H, *m* and *p* to P), 2.37 (d, <sup>2</sup>J<sub>HP</sub> = 9.5 Hz, 4H, PCH<sub>2</sub>), 0.52 (s, 6H, CH<sub>3</sub>); <sup>13</sup>C{<sup>1</sup>H} <sup>s3</sup> 135.0 (virtual t, <sup>s4</sup> <sup>2</sup>J<sub>CP</sub> = 4.7 Hz, *o* to P), 132.0 (m *J* = 72.5 Hz, *J* = 4.7 Hz, *i* to P), 131.6 (s, *p* to P), 128.6 (virtual t, <sup>s4</sup> <sup>3</sup>J<sub>CP</sub> = 5.8 Hz, *m* to P), 35.5 (t, <sup>1</sup>J<sub>CP</sub> = 21.8 Hz, PCH<sub>2</sub>), 32.4 (t, <sup>2</sup>J<sub>CP</sub> = 7.2 Hz, C(CH<sub>2</sub>)<sub>4</sub>), 30.4

( $\underline{\text{CH}_3}$ );  $^{31}\text{P}\{^1\text{H}\}$   $-6.2$  (s,  $^1J_{\text{PPt}} = 3223$  Hz).<sup>s5</sup>

IR ( $\text{cm}^{-1}$ , powder film): 2895 (m), 1435 (s), 1099 (s), 841 (s), 802 (s), 746 (s). MS:<sup>s7</sup>  $\text{ESI}^+$ , 762.0497 ( $[\text{M} - \text{I}]^+$  (calc. 762.0510), 100%).

**( $\text{Et}_2\text{C}(\text{CH}_2\text{PPh}_2)_2$ )PtI<sub>2</sub>.** A round-bottom flask was charged with ( $\text{Et}_2\text{C}(\text{CH}_2\text{PPh}_2)_2$ )PtCl<sub>2</sub> (0.1030 g, 0.1402 mmol), KI (0.0710 g, 0.4277 mmol), CH<sub>2</sub>Cl<sub>2</sub> (10 mL), and acetone (10 mL) with stirring. After 24 h, the solvent was removed by rotary evaporation. The residue was washed with H<sub>2</sub>O (3 x 30 mL) and Et<sub>2</sub>O (3 x 30 mL) and dried by oil pump vacuum (3 h) to give ( $\text{Et}_2\text{C}(\text{CH}_2\text{PPh}_2)_2$ )PtI<sub>2</sub> as a yellow solid (0.1237 mg, 0.1348 mmol, 96%) that blackened at 354 °C and further decomposed at 387 °C. Anal. Calcd. for C<sub>31</sub>H<sub>34</sub>I<sub>2</sub>P<sub>2</sub>Pt (917.45): C, 40.58; H, 3.74; Found: C, 41.16; H, 3.70.

NMR ( $\delta$  (ppm), CD<sub>2</sub>Cl<sub>2</sub>):  $^1\text{H}$  (500 MHz) 7.99-7.93 (m, 8H, *o* to P), 7.56-7.51 (m, 12H, *m* and *p* to P), 2.34 (d,  $^2J_{\text{HP}} = 9.4$  Hz, 4H,  $\text{PCH}_2$ ), 0.89 (q,  $^3J_{\text{HH}} = 7.4$  Hz, 4H,  $\text{CH}_2\text{CH}_3$ ), 0.26 (t,  $^3J_{\text{HH}} = 7.4$  Hz, 6H,  $\text{CH}_3$ );  $^{13}\text{C}\{^1\text{H}\}$ <sup>s3</sup> 135.0 (virtual t,  $^2J_{\text{CP}} = 5.4$  Hz, *o* to P), 132.0 (m,  $J = 70.4$  Hz,  $J = 5.7$  Hz, *i* to P), 131.6 (s, *p* to P), 128.6 (virtual t,  $^3J_{\text{CP}} = 5.7$  Hz, *m* to P), 41.2 (s,  $\text{CH}_2\text{CH}_3$ ), 35.5 (t,  $^1J_{\text{CP}} = 21.2$  Hz,  $\text{PCH}_2$ ), 32.4 (t,  $^2J_{\text{CP}} = 8.1$  Hz,  $\text{C}(\text{CH}_2)_4$ ), 6.4 (s,  $\text{CH}_3$ );  $^{31}\text{P}\{^1\text{H}\}$   $-7.0$  (s,  $^1J_{\text{PPt}} = 3214$  Hz).<sup>s5</sup>

IR ( $\text{cm}^{-1}$ , powder film): 2974 (w), 2914 (w), 2849 (w), 1437 (s), 1099 (s), 820 (m), 741 (s). MS:<sup>s7</sup>  $\text{ESI}^+$ , 790.0812 ( $[\text{M} - \text{I}]^+$  (calc. 790.0823), 70%).

**$[(\text{Me}_2\text{C}(\text{CH}_2\text{PPh}_2)_2)\text{Pt}(\text{C}\equiv\text{C})_2]_4\cdot[\text{H}_2\text{NEt}_2^+\text{I}^-]$  (**1**· $\text{Ha}^+\text{I}^-$ ).** A Schlenk flask was charged with ( $\text{Me}_2\text{C}(\text{CH}_2\text{PPh}_2)_2$ )PtI<sub>2</sub> (0.3652 g, 0.4106 mmol), ( $\text{Me}_2\text{C}(\text{CH}_2\text{PPh}_2)_2$ )Pt((C≡C)<sub>2</sub>H)<sub>2</sub> (0.3007 g, 0.4098 mmol),<sup>s1</sup> THF (150 mL), HNEt<sub>2</sub> (60 mL), and CuI (0.0186 g, 0.0977 mmol) with stirring and heated to 55 °C. After 3 d, the precipitate was isolated by filtration, washed with Et<sub>2</sub>O (400 mL) and hexanes (400 mL), and dried by oil pump vacuum (rt, 20 h) to give **1**· $\text{Ha}^+\text{I}^-$  as a bright yellow solid (0.4430 g, 0.1509 mmol, 74%) that blackened at 200 °C and further decomposed at 221 °C.  $^1\text{H}$  and  $^{13}\text{C}\{^1\text{H}\}$  NMR spectra showed minor impurities. Anal. Calcd. for C<sub>136</sub>H<sub>132</sub>INP<sub>8</sub>Pt<sub>4</sub> (2935.59): C, 55.64; H, 4.53; N, 0.48; I, 4.32; Found: C, 50.55; H, 4.54; N, 0.50; I, 4.43.

NMR ( $\delta$  (ppm), CD<sub>2</sub>Cl<sub>2</sub>):  $^1\text{H}$  7.64 (t, 32H,  $^3J_{\text{HH}} = 8.8$  Hz, *m* to P), 7.29 (t,  $^3J_{\text{HH}} = 7.8$  Hz,

16H, *p* to P), 7.17 (t,  $^3J_{\text{HH}} = 8.0$  Hz, 32H, *o* to P), 3.51 (br s, 4H,  $\text{NCH}_2$ ), 2.27 (d,  $^2J_{\text{HP}} = 9.9$  Hz, 16H,  $\text{PCH}_2$ ), 1.35 (t,  $^3J_{\text{HH}} = 6.6$  Hz, 6H,  $\text{NCH}_2\text{CH}_3$ ), 0.67 (s, 24H,  $\text{CH}_3$ );  $^{13}\text{C}\{^1\text{H}\}$  133.9 (virtual t,  $^4J_{\text{CP}} = 5.0$  Hz, *o* to P), 132.5 (m,  $^6J = 66.3$  Hz,  $J = 10.1$  Hz, *i* to P), 130.3 (s, *p* to P), 128.0 (virtual t,  $^4J_{\text{CP}} = 5.1$  Hz, *m* to P), 96.2 (m,  $\text{PtC}\equiv\text{C}$ ), 93.1 (dd,  $^2J_{\text{CP}} = 146.9$  Hz,  $^2J_{\text{CP}} = 21.8$  Hz,  $\text{PtC}\equiv\text{C}$ ), 44.9 (s,  $\text{NCH}_2$ ), 37.2 (t,  $^2J_{\text{CP}} = 16.6$  Hz,  $\text{C}(\text{CH}_2)_4$ ), 35.9 (s,  $\text{CH}_3$ ), 32.6 (t,  $^1J_{\text{CP}} = 7.2$  Hz,  $\text{PCH}_2$ ), 12.1 (s,  $\text{NCH}_2\text{CH}_3$ );  $^{31}\text{P}\{^1\text{H}\} -5.6$  (s,  $^1J_{\text{PPt}} = 2217$  Hz).<sup>s5</sup>

IR ( $\text{cm}^{-1}$ , powder film): 3051 (w), 2954 (m), 2864 (m), 2151 (w,  $\nu_{\text{C}\equiv\text{C}}$ ), 1574 (m), 1433 (s), 1097 (s), 804 (s), 723 (s), 691 (s). MS:<sup>s7</sup>  $\text{ESI}^+$ , 1478.9111 ( $[\text{M}' + \text{H}_2\text{NEt}_2 + \text{I} + \text{Na} + \text{H}]^{2+}$  (calc. 1479.2938), 100%), 1404.3522 ( $[\text{M}' + \text{H} + \text{H}_2\text{NEt}_2]^{2+}$  (calc. 1404.3467), 81%), 1378.7930 ( $[\text{M}' + \text{Na} + \text{H}]^{2+}$  (calc. 1378.7931), 25%); MALDI<sup>+</sup> (matrix DCTB), 2733 ( $[\text{M}' + \text{H}]^+$ , 100%).

$[(\text{Me}_2\text{C}(\text{CH}_2\text{PPh}_2)_2)\text{Pt}(\text{C}\equiv\text{C})_2]_4\cdot[\text{H}_2\text{N}(\text{CH}_2\text{CH}_2)_2\text{O}^+\text{I}^-]_3$  ( $1\cdot(\text{Hc}^+\text{I}^-)_3$ ). A Schlenk flask was charged with  $(\text{Me}_2\text{C}(\text{CH}_2\text{PPh}_2)_2)\text{PtI}_2$  (0.1004 g, 0.1129 mmol),  $(\text{Me}_2\text{C}(\text{CH}_2\text{PPh}_2)_2)\text{Pt}((\text{C}\equiv\text{C})_2\text{H})_2$  (0.0953 g, 0.1299 mmol), THF (50 mL), morpholine (25 mL), and CuI (0.008 g, 0.042 mmol) with stirring and heated to 60 °C. After 6 d, the yellow precipitate was isolated by filtration, washed with Et<sub>2</sub>O (150 mL) and hexanes (150 mL). While on the frit, the sample was dissolved in CH<sub>2</sub>Cl<sub>2</sub> and filtered into a fresh flask. The solvent was removed from the filtrate by rotary evaporation and dried by oil pump vacuum (rt, 20 h) to give  $1\cdot(\text{Hc}^+\text{I}^-)_3$  as a yellow-orange solid (0.1208 g, 0.0357 mmol, 63%) that blackened at 133 °C and melted at 205 °C. Anal. Calcd. for C<sub>144</sub>H<sub>150</sub>I<sub>3</sub>N<sub>3</sub>O<sub>3</sub>P<sub>8</sub>Pt<sub>4</sub> (3379.64): C, 51.18; H, 4.47; N, 1.24; I, 11.26; Found: C, 51.70; H, 4.61; N, 1.67; I, 7.10.

NMR ( $\delta$  (ppm), CDCl<sub>3</sub>):  $^1\text{H}$  7.65 (t, 32H,  $^3J_{\text{HH}} = 7.2$  Hz, *m* to P), 7.30 (t,  $^3J_{\text{HH}} = 7.3$  Hz, 16H, *p* to P), 7.21 (t,  $^3J_{\text{HH}} = 6.8$  Hz, 32H, *o* to P), 3.53 (br s, 12H,  $\text{OCH}_2$ ), 2.94 (br s, 12H,  $\text{NCH}_2$ ), 2.33 (d,  $^2J_{\text{HP}} = 7.1$  Hz, 16H,  $\text{PCH}_2$ ), 0.63 (s, 24H,  $\text{CH}_3$ );  $^{13}\text{C}\{^1\text{H}\}$  134.0 (s, *o* to P), 132.4 (m,  $^6J = 65.2$  Hz,  $J = 6.8$  Hz, *i* to P), 130.4 (s, *p* to P), 128.2 (virtual t,  $^4J_{\text{CP}} = 5.0$  Hz, *m* to P), 97.4 (m,  $\text{PtC}\equiv\text{C}$ ), 93.1 (dd,  $^2J_{\text{CP}} = 138.2$  Hz,  $^2J_{\text{CP}} = 19.9$  Hz,  $\text{PtC}\equiv\text{C}$ ), 66.1 (s,  $\text{OCH}_2$ ), 44.9 (s,  $\text{NCH}_2$ ), 37.4 (t,  $^2J_{\text{CP}} = 16.0$  Hz,  $\text{C}(\text{CH}_2)_4$ ), 36.1 (s,  $\text{CH}_3$ ), 33.1 (t,  $^1J_{\text{CP}} = 6.9$  Hz,  $\text{PCH}_2$ );  $^{31}\text{P}\{^1\text{H}\} -5.3$  (s,  $^1J_{\text{PPt}} = 2220$  Hz).<sup>s5</sup>

IR (cm<sup>-1</sup>, powder film): 3049 (w), 2935 (m), 2924 (w), 2858 (w), 2156 (w,  $\nu_{\text{C}\equiv\text{C}}$ ), 1645 (w), 1433 (s), 1097 (s), 804 (m), 723 (s). MS:<sup>s7</sup> ESI<sup>+</sup>, 1411.3357 ([**M'** + H<sub>2</sub>N(CH<sub>2</sub>CH<sub>2</sub>)<sub>2</sub>O + H]<sup>2+</sup> (calc. 1410.3320), 100%); MALDI<sup>+</sup> (matrix DCTB), 2734 ([**M'** + H]<sup>+</sup>, 50%).

$[(\text{Et}_2\text{C}(\text{CH}_2\text{PPh}_2)_2)\text{Pt}(\text{C}\equiv\text{C})_2]_4\cdot[\text{H}_2\text{NEt}_2^+\text{I}^-] \cdot (2\cdot\text{Ha}^+\text{I}^-)$ . A Schlenk flask was charged with (Et<sub>2</sub>C(CH<sub>2</sub>PPh<sub>2</sub>)<sub>2</sub>)PtI<sub>2</sub> (0.3627 g, 0.3953 mmol), (Et<sub>2</sub>C(CH<sub>2</sub>PPh<sub>2</sub>)<sub>2</sub>)Pt((C≡C)<sub>2</sub>H)<sub>2</sub> (0.3002 g, 0.3941 mmol),<sup>s1</sup> THF (150 mL), HNEt<sub>2</sub> (60 mL), and CuI (0.022 g, 0.116 mmol) with stirring and heated to 55 °C. After 3 d, the precipitate was isolated by filtration, washed with Et<sub>2</sub>O (400 mL) and hexanes (400 mL), and dried by oil pump vacuum (rt, 20 h) to give **2**·Ha<sup>+</sup>I<sup>-</sup> as a yellow solid (0.4347 g, 0.1426 mmol, 72%) that blackened at 207 °C and further decomposed at 250 °C. The <sup>1</sup>H and <sup>13</sup>C{<sup>1</sup>H} NMR spectra showed minor impurities.

NMR (δ (ppm), CD<sub>2</sub>Cl<sub>2</sub>): <sup>1</sup>H 7.66 (t, <sup>3</sup>J<sub>HH</sub> = 9.0 Hz, 32H *m* to P), 7.29 (t, <sup>3</sup>J<sub>HH</sub> = 7.4 Hz, 16H, *p* to P), 7.16 (t, <sup>3</sup>J<sub>HH</sub> = 7.4 Hz, 32H, *o* to P), 3.57 (br s, 4H, NCH<sub>2</sub>), 2.26 (d, <sup>2</sup>J<sub>HP</sub> = 9.0 Hz, 16H, PCH<sub>2</sub>), 1.37 (t, <sup>3</sup>J<sub>HH</sub> = 7.3 Hz, 6H, NCH<sub>2</sub>CH<sub>3</sub>), 1.10 (q, <sup>3</sup>J<sub>HH</sub> = 7.0 Hz, 16H, CH<sub>2</sub>CH<sub>3</sub>), 0.25 (t, <sup>3</sup>J<sub>HH</sub> = 7.3 Hz, 24H, CH<sub>3</sub>); <sup>13</sup>C{<sup>1</sup>H} 134.2 (virtual t, <sup>s4</sup> <sup>2</sup>J<sub>CP</sub> = 4.9 Hz, *o* to P), 133.1 (m<sup>s6</sup> *J* = 58.5 Hz, *J* = 8.8 Hz, *i* to P), 130.6 (s, *p* to P), 128.4 (virtual t, <sup>s4</sup> <sup>3</sup>J<sub>CP</sub> = 5.0 Hz, *m* to P), 96.4 (m, PtC≡C), 93.6 (dd, <sup>2</sup>J<sub>CP</sub> = 145.2 Hz, <sup>2</sup>J<sub>CP</sub> = 20.5 Hz, PtC≡C), 45.4 (s, NCH<sub>2</sub>), 41.9 (s, CH<sub>2</sub>CH<sub>3</sub>), 34.1 (t, <sup>1</sup>J<sub>CP</sub> = 17.2 Hz, PCH<sub>2</sub>), 32.5 (t, <sup>2</sup>J<sub>CP</sub> = 7.1 Hz, C(CH<sub>2</sub>)<sub>4</sub>), 12.5 (s, NCH<sub>2</sub>CH<sub>3</sub>), 6.7 (s, CH<sub>3</sub>); <sup>31</sup>P{<sup>1</sup>H} -7.2 (s, <sup>1</sup>J<sub>Ppt</sub> = 2222 Hz).<sup>s5</sup> MS:<sup>s7</sup> ESI<sup>+</sup>, 1460.9137 ([**M'** + H<sub>2</sub>NEt<sub>2</sub> + H]<sup>2+</sup> (calc. 1460.4093), 100%), 1432.3821 ([**M'** + H<sub>3</sub>O + H]<sup>2+</sup> (calc. 1432.8700), 63%); MALDI<sup>+</sup> (matrix DCTB), 2846 ([**M'** + H]<sup>+</sup>, 100%).

$[(\text{Et}_2\text{C}(\text{CH}_2\text{PPh}_2)_2)\text{Pt}(\text{C}\equiv\text{C})_2]_4\cdot[\text{H}_2\text{N}(\text{CH}_2\text{CH}=\text{CH}_2)_2^+\text{I}^-]_2 \cdot (2\cdot\text{Hb}^+\text{I}^-)$ . A Schlenk flask was charged with (Et<sub>2</sub>C(CH<sub>2</sub>PPh<sub>2</sub>)<sub>2</sub>)PtI<sub>2</sub> (0.0504 g, 0.0549 mmol), (Et<sub>2</sub>C(CH<sub>2</sub>PPh<sub>2</sub>)<sub>2</sub>)Pt((C≡C)<sub>2</sub>-H)<sub>2</sub> (0.0502 g, 0.0659 mmol), THF (20 mL), diallylamine (10 mL), and CuI (0.0033 g, 0.0173 mmol) with stirring and heated to 60 °C. After 3 d, the precipitate was isolated by filtration, washed with Et<sub>2</sub>O (100 mL) and hexanes (100 mL), and dried by oil pump vacuum (rt, 8 h) to give **2**·Hb<sup>+</sup>I<sup>-</sup> as a bright yellow solid (0.0352 g, 0.0115 mmol, 42%) that blackened at 180 °C and further decomposed at 242 °C. Anal. Calcd. for C<sub>146</sub>H<sub>149</sub>INP<sub>8</sub>Pt<sub>4</sub> (3072.84): C, 57.07; H, 4.89; N, 0.46; I, 4.13;

Found: C, 55.00; H, 4.86; N, 0.64; I, 4.30.

NMR ( $\delta$  (ppm),  $\text{CDCl}_3$ ):  $^1\text{H}$  7.68 (t,  $^3J_{\text{HH}} = 8.8$  Hz, 32H, *m* to P), 7.21 (t,  $^3J_{\text{HH}} = 7.6$  Hz, 16H, *p* to P), 7.05 (t,  $^3J_{\text{HH}} = 7.3$  Hz, 32H, *o* to P), 6.27 (m with fine structure, 2H,  $\text{NCH}_2\text{CH=}$ ), 5.86 (d,  $^3J_{\text{HHtrans}} = 17.8$  Hz, 2H,  $\text{NCH}_2\text{CH=CH}_E\text{H}_Z$ ), 5.42 (d,  $^3J_{\text{HHcis}} = 11.5$  Hz, 2H,  $\text{NCH}_2\text{CH=CH}_E\text{H}_Z$ ), 4.43 (apparent d,  $^2J_{\text{HH}} = 6.4$  Hz, 4H,  $\text{NCH}_2\text{CH=}$ ), 2.21 (d,  $^2J_{\text{HP}} = 8.9$  Hz, 16H,  $\text{PCH}_2$ ), 1.10 (q,  $^3J_{\text{HH}} = 7.2$  Hz, 16H,  $\text{CH}_2\text{CH}_3$ ), 0.23 (t,  $^3J_{\text{HH}} = 7.3$  Hz, 24H,  $\text{CH}_3$ );  $^{13}\text{C}\{^1\text{H}\}$  134.2 (virtual t,  $^s4^2J_{\text{CP}} = 5.0$  Hz, *o* to P), 133.0 (m,  $^s6J = 57.8$  Hz,  $J = 8.4$  Hz, *i* to P), 130.2 (s, *p* to P), 129.2 (s,  $\text{NCH}_2\text{CHCH}_2$ ), 128.2 (virtual t,  $^s4^3J_{\text{CP}} = 4.7$  Hz, *m* to P), 123.3 (s,  $\text{NCH}_2\text{CHCH}_2$ ), 97.2 (m with t component,  $J = 20.2$  Hz,  $\text{PtC}\equiv\text{C}$ ), 92.2 (dd,  $^2J_{\text{CP}} = 149.8$  Hz,  $^2J_{\text{CP}} = 21.7$  Hz,  $\text{PtC}\equiv\text{C}$ ), 51.8 (s,  $\text{NCH}_2\text{CHCH}_2$ ), 41.6 (s,  $\text{CH}_2\text{CH}_3$ ), 34.5 (t,  $^1J_{\text{CP}} = 17.6$  Hz,  $\text{PCH}_2$ ), 32.2 (t,  $^2J_{\text{CP}} = 5.7$  Hz,  $\text{C}(\text{CH}_2)_4$ ), 6.7 (s,  $\text{CH}_3$ );  $^{31}\text{P}\{^1\text{H}\}$  -7.76 (s,  $^1J_{\text{PPt}} = 2228$  Hz).<sup>s5</sup>

IR ( $\text{cm}^{-1}$ , powder film): 3061 (m), 2939 (m), 2924 (m), 2856 (m), 2147 (w,  $\nu_{\text{C}\equiv\text{C}}$ ), 1616 (w), 1433 (s), 1097 (s), 740 (s), 661 (s). MS:<sup>s7</sup>  $\text{ESI}^+$ , 1455.3251 ( $[\text{M}' + \text{Cu} + \text{H}]^{2+}$  (calc. 1454.8256), 55%), 1432.3777 ( $[\text{M}' + \text{H} + \text{H}_3\text{O}]^{2+}$  (calc. 1432.8700), 100%);  $\text{APCI}^+$ , 2944.6357 ( $[\text{M}' + \text{H}_2\text{N}(\text{CH}_2\text{CH=CH}_2)_2]^{+}$  (calc. 2943.8176), 1%, 10% for ions of  $m/z > 1650$ ), 2910.6572 ( $[\text{M}' + \text{Cu}]^{+}$  (calc. 2909.6517), 12%, 100% for ions of  $m/z > 1650$ ).

$[(\text{Et}_2\text{C}(\text{CH}_2\text{PPh}_2)_2)\text{Pt}(\text{C}\equiv\text{C})_2]_4 \cdot [\text{HNEt}_3^+\text{I}^-]_3 \cdot (2 \cdot (\text{Hd}^+\text{I}^-))_3$ . A Schlenk flask was charged with  $(\text{Et}_2\text{C}(\text{CH}_2\text{PPh}_2)_2)\text{PtI}_2$  (0.1003 g, 0.1093 mmol),  $(\text{Et}_2\text{C}(\text{CH}_2\text{PPh}_2)_2)\text{Pt}((\text{C}\equiv\text{C})_2\text{H})_2$  (0.1001 g, 0.1314 mmol), THF (50 mL),  $\text{NEt}_3$  (20 mL), and  $\text{CuI}$  (0.0067 g, 0.0352 mmol) with stirring and heated to 60 °C. After 4 d, the precipitate was isolated by filtration, washed with  $\text{Et}_2\text{O}$  (300 mL) and hexanes (300 mL), and dried by oil pump vacuum (rt, 20 h) to give  $2 \cdot (\text{Hd}^+\text{I}^-)_3$  as a yellow solid (0.1777 g, 0.0503 mmol, 92%) that blackened at 199 °C and further decomposed at 220 °C. Anal. Calcd. for  $\text{C}_{158}\text{H}_{184}\text{I}_3\text{N}_3\text{P}_8\text{Pt}_4$  (3534.07): C, 53.70; H, 5.25; N, 1.19; I, 10.77; Found: C, 51.38; H, 5.01; N, 1.18; I, 11.24.

NMR ( $\delta$  (ppm),  $\text{CD}_2\text{Cl}_2$ ):  $^1\text{H}$  7.65 (t,  $^3J_{\text{HH}} = 8.3$  Hz, 32H, *m* to P), 7.29 (t,  $^3J_{\text{HH}} = 7.3$  Hz, 16H, *p* to P), 7.16 (t,  $^3J_{\text{HH}} = 7.3$  Hz, 32H, *o* to P), 3.01 (q,  $^3J_{\text{HH}} = 7.2$  Hz, 18H,  $\text{NCH}_2$ ), 2.27 (d,  $^2J_{\text{HP}} = 9.4$  Hz, 16H,  $\text{PCH}_2$ ), 1.19 (t,  $^3J_{\text{HH}} = 7.3$  Hz, 27H,  $\text{NCH}_2\text{CH}_3$ ), 1.08 (q,  $^3J_{\text{HH}} = 6.5$  Hz,

16H,  $\underline{\text{CH}}_2\text{CH}_3$ ), 0.23 (t,  $^3J_{\text{HH}} = 6.9$  Hz, 24H,  $\underline{\text{CH}}_3$ );  $^{13}\text{C}\{^1\text{H}\}$  134.5 (virtual t,  $^{\text{s4}}J_{\text{CP}} = 5.0$  Hz, *o* to P), 133.1 (m,  $^{\text{s6}}J = 58.6$  Hz,  $J = 8.1$  Hz, *i* to P), 130.5 (s, *p* to P), 128.4 (s, *m* to P), 97.0 (m,  $\text{PtC}\equiv\underline{\text{C}}$ ), 92.4 (dd,  $^2J_{\text{CP}} = 152.5$  Hz,  $^2J_{\text{CP}} = 17.7$  Hz,  $\text{Pt}\underline{\text{C}}\equiv\text{C}$ ), 46.9 s,  $\text{N}\underline{\text{CH}}_2$ ), 41.9 (s,  $\underline{\text{CH}}_2\text{CH}_3$ ), 34.1 (t,  $^1J_{\text{CP}} = 18.1$  Hz,  $\text{P}\underline{\text{CH}}_2$ ), 32.4 (t,  $^2J_{\text{CP}} = 5.8$  Hz,  $\underline{\text{C}}(\text{CH}_2)_4$ ), 9.1 (s,  $\text{NCH}_2\underline{\text{CH}}_3$ ), 6.6 (s,  $\underline{\text{CH}}_3$ );  $^{31}\text{P}\{^1\text{H}\} -7.0$  (s,  $^1J_{\text{PPt}} = 2204$  Hz).<sup>s5</sup>

IR ( $\text{cm}^{-1}$ , powder film): 3049 (w), 2963 (w), 2935 (w), 2878 (w), 2142 (w,  $\nu_{\text{C}\equiv\text{C}}$ ) 1433 (s), 1120 (m), 1098 (s), 831 (m), 740 (s). MS:<sup>s7</sup>  $\text{APCI}^+$ , 2946.6341 ( $[\text{M}' + \text{HNEt}_3]^+$  (calc. 2946.8411), 5%, 11% for ions of  $m/z > 1500$ ), 2846.7391 ( $[\text{M}' + \text{H}]^+$  (calc. 2846.7535), 45%, 100% for ions of  $m/z > 1500$ ); MALDI<sup>+</sup> (matrix DCTB), 2846 ( $[\text{M}' + \text{H}]^+$ , 100%).

**DOSY NMR.** Spectra were recorded on a Varian NMRS 500 MHz spectrometer equipped with a 5 mm Auto-Switchable probe and a *z* gradient coil (up to 30 G/cm). The probe temperature was kept at 25 °C, and the samples were allowed to equilibrate for at least 15 min.  $^1\text{H}$  diffusion experiments were carried out with static samples using the convection-compensated bipolar pulse pair stimulated echo pulse sequence (Dbppste\_cc).<sup>s8</sup> The 90° pulse was 14.2  $\mu\text{s}$ . The incremented gradient strength (*g*) was varied from 1 to 30 G/cm. The bipolar pulse gradient duration ( $\delta$ ) was 2 ms, and the diffusion period ( $\Delta$ ) was 30-50 ms. The number of transients per increment was 16 with a relaxation delay of 2 s. The field gradient strength was calibrated by measuring the self-diffusivity (*D*s) of 10%  $\text{D}_2\text{O}$  in  $\text{H}_2\text{O}$  ( $D\text{s} = 22.7 \times 10^{-1} \text{ m}^2 \text{ s}^{-1}$ ).<sup>s9</sup> DOSY spectra were generated with the program MestReNova 6.0.2.<sup>s10</sup>

### Crystallography

**A.**<sup>s11</sup> A  $\text{CH}_2\text{Cl}_2$  solution of  $\mathbf{1} \cdot \text{Ha}^+\text{I}^-$  was layered with hexanes. After 24 h, yellow blocks were obtained. The crystals were very unstable when removed from the mother liquor (presumed desolvation, including after mounting using various oils), complicating data collection, which is outlined in Table s1. Both Cu and Mo sources were used in efforts to optimize the data. Integrated intensity information for each reflection was obtained by reduction of the data frames with the program APEX3.<sup>s12</sup> Lorentz, polarization, crystal decay, and absorption corrections were applied, the last with the program SADABS.<sup>s13</sup> Some disordered dichloromethane molecules were found,

with partial occupancy per the formula unit  $1 \cdot \text{H}^+\text{I}^- \cdot 1.62\text{CH}_2\text{Cl}_2$ .<sup>s14-s16</sup> Hydrogen atoms were placed in idealized positions using a riding model. All non-hydrogen atoms were refined with anisotropic thermal parameters. Appropriate restraints were added to keep the bond distances, angles, and thermal ellipsoids of the solvent molecules meaningful.<sup>s17</sup> The absence of additional symmetry were confirmed using PLATON (ADDSYM).<sup>s18</sup> The structure was refined (weighted least squares refinement on  $F^2$ ) to convergence.<sup>s19,s20,s21</sup>

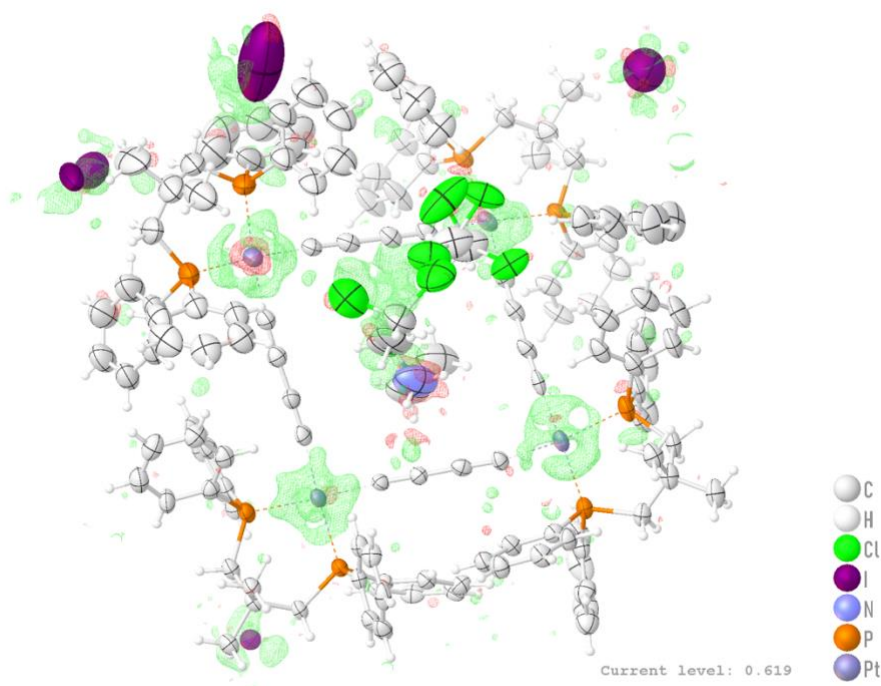

**Figure s1.** Residual electron density map for  $1 \cdot \text{H}^+\text{I}^-$  (see the `_refine_special_details` and/or `_vrf` responses to the CHECKCIF alerts in the CIF files for more details regarding the peaks).

**B.**<sup>s11</sup> A  $\text{CH}_2\text{Cl}_2$  solution of  $1 \cdot \text{H}^+\text{I}^-$  was layered with hexanes. After 24 h, yellow blocks were obtained that proved to be the anion metathesis product  $1 \cdot \text{H}^+\text{Cl}^-$ , which were very unstable when removed from the mother liquor (presumed desolvation, including after mounting using various oils or in sealed glass capillaries). Data were collected as outlined in Table s1. Both Cu and Mo sources were used in efforts to optimize the data. Integrated intensity information for each reflection was obtained by reduction of the data frames with the program APEX3.<sup>s12</sup> Lorentz, polarization, crystal decay, and absorption corrections were applied, the last with the program

SADABS.<sup>s13</sup> Hydrogen atoms were placed in idealized positions using a riding model. All non-hydrogen atoms were refined with anisotropic thermal parameters. The absence of additional symmetry or voids were confirmed using PLATON (ADDSYM).<sup>s18</sup> The morpholinium ion was modeled with the cyclohexane template in OLEX2 and was strongly restrained to keep the bond distances, angles, and thermal ellipsoids meaningful. The solvent molecules, all of which were disordered or in partially occupied positions, were MASKED with OLEX2. The structure was refined (weighted least squares refinement on  $F^2$ ) to convergence.<sup>s19,s20</sup> As noted in the text, the morpholine nitrogen atom has been reassigned from that in the CIF file to the atom that gives the closest H<sub>2</sub>N interactions with the Pt<sub>4</sub>C<sub>16</sub> moiety.<sup>s22</sup>

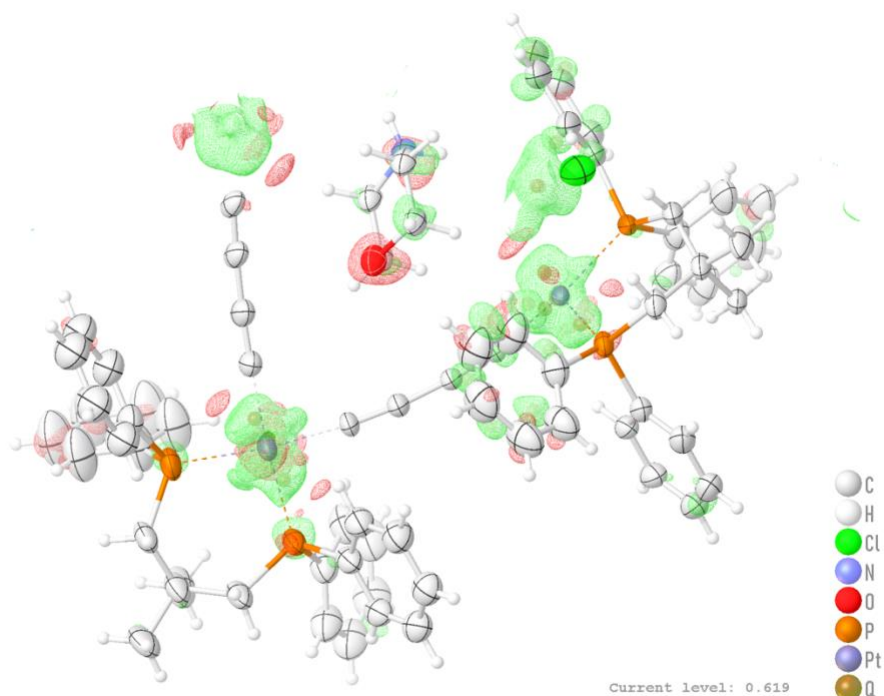

**Figure s2.** Residual electron density map for **1**·(Hc<sup>+</sup>Cl<sup>-</sup>)<sub>3</sub>. (see the `_refine_special_details` and/or `_vrf` responses to the CHECKCIF alerts in the CIF files for more details regarding the peaks).

**C.**<sup>s11</sup> A CHCl<sub>3</sub> solution of **2**·Hb<sup>+</sup>I<sup>-</sup> was layered with toluene. After 24 h, colorless blocks were obtained. The crystals (including those grown from other solvent mixtures) were very unstable when removed from the mother liquor (presumed desolvation, including after mounting using various oils), complicating data collection, which is outlined in Table s1. Integrated intensity infor-

mation for each reflection was obtained by reduction of the data frames with the program APEX3.<sup>s12</sup> Lorentz, polarization, crystal decay, and absorption corrections were applied, the last with the program SADABS.<sup>s13</sup> A solution was readily obtained using XT/XS in APEX3.<sup>s12,s19</sup> Hydrogen atoms were placed in idealized positions using a riding model. All non-hydrogen atoms were refined with anisotropic thermal parameters. The absence of additional symmetry and voids were confirmed using PLATON (ADDSYM).<sup>s18</sup> Some disordered chloroform and toluene molecules were found, with partial occupancy per the formula unit  $2 \cdot \text{Hb}^+\text{I}^- \cdot 3.75\text{CHCl}_3 \cdot 2.83\text{C}_7\text{H}_8$ . Other residual electron density peaks could not be modeled, and were SQUEEZED using PLATON. Elongated ellipsoids on some of the phenyl groups indicated possible disorder, but no further modeling efforts were undertaken. The structure was refined (weighted least squares refinement on  $F^2$ ) to convergence.<sup>s19,s20,s23</sup>

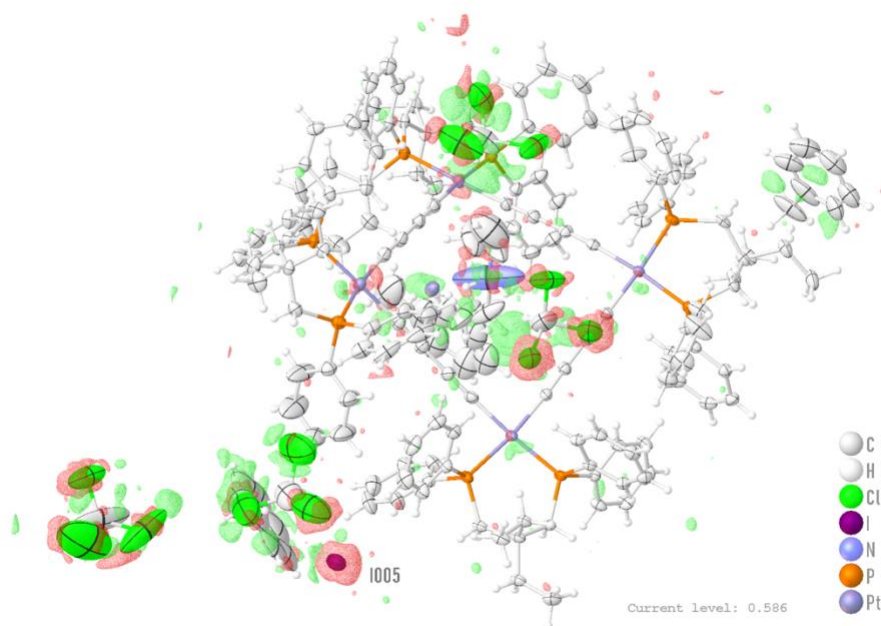

**Figure s3.** Residual electron density map for  $2 \cdot \text{Hb}^+\text{I}^-$  (see the `_refine_special_details` and/or `_vrf` responses to the CHECKCIF alerts in the CIF files for more details regarding the peaks).

## References

(s1) Collins, B. K.; Clough-Mastry, M.; Ehnbohm, A.; Bhuvanesh, N.; Hall, M. B.; Gladysz, J. A. Macrocyclic Complexes Derived from Four *cis*-L<sub>2</sub>Pt Corners and Four Butadiynediyl Linkers; Syntheses, Electronic Structures, and Square versus Skew Rhombus Geometries. *Chem. Eur. J.* **2021**, 27, 10021-10039.

(s2) van Rijn, J. A.; Siegler, M. A.; Spek, A. L.; Bouwman, E.; Drent, E. Ruthenium-Di-phosphine-Catalyzed Allylation of Phenols: A *gem*-Dialkyl-Type Effect Induces High Selectivity toward O-Allylation. *Organometallics*, **2009**, 28, 7006-7014.

(s3) Due to the analyte solubility, this spectrum was recorded using a cryoprobe.

(s4) Hersh, W. H. False AA'X Spin-Spin Coupling Systems in <sup>13</sup>C NMR: Examples Involving Phosphorous and a 20-Year-Old Mystery in Off-Resonance Decoupling. *J. Chem. Educ.* **1997**, 74, 1485-1488.

(s5) This coupling represents a satellite (d, <sup>195</sup>Pt = 33.8%), and is not reflected in the peak multiplicity given.

(s6) This signal is part of a complex spin system<sup>s1</sup> and the *J* values refer to a component that is an apparent dd.

(s7) *m/z*; **M'** refers to the mass of the neutral [L<sub>2</sub>PtC<sub>4</sub>]<sub>4</sub> macrocycle.

(s8) Jerschow, A.; Muller, N. Suppression of Convection Artifacts in Stimulated-Echo Diffusion Experiments. Double-Stimulated-Echo Experiments. *J. Magn. Reson.* **1997**, 125, 372-375.

(s9) Antalek, B. Using pulsed gradient spin echo NMR for chemical mixture analysis: how to obtain optimum results. *Concepts Magn. Reson.* **2002**, 14, 225-258.

(s10) *MestReNova*, version 6.0.2; Mestrelab Research: Santiago de Compostela, Spain, 2009.

(s11) For additional details on the challenges in solving this structure, see the checkCIF report.

(s12) APEX3 “Program for Data Collection on Area Detectors” BRUKER AXS Inc., 5465 East Cheryl Parkway, Madison, WI 53711-5373 USA.

(s13) SADABS, Sheldrick, G. M. “Program for Absorption Correction of Area Detector Frames”, BRUKER AXS Inc., 5465 East Cheryl Parkway, Madison, WI 53711-5373 USA.

(s14) Only one iodide ion location could be found, occupying a special position (1/3,2/3, 0.199) with an occupancy of 0.3333. Since experimental data strongly suggested a full equivalent, iodide ions were distributed at the residual electron density peaks with restraints to ensure an overall occupancy of 1.

(s15) Fourier difference maps showed residual electron density peaks near the iodide ion locations, suggesting additional solvent molecules (disordered and/or with partial occupancies; R1 –5.81 and wR2 19.07 at this stage). Olex2 was used to mask these molecules (R1 –5.06 and wR2 14.81).

(s16) A solvent mask was calculated and 401 electrons were found in a volume of 4447 Å<sup>3</sup> in 3 voids per unit cell. This is consistent with the presence of 1.5CH<sub>2</sub>Cl<sub>2</sub> and 0.5H<sub>2</sub>O per formula unit **1**·Ha<sup>+</sup>I<sup>–</sup>·1.62CH<sub>2</sub>Cl<sub>2</sub>, corresponding to 408 electrons per unit cell.

(s17) Some of the phenyl and methyl groups showed elongated ellipsoids suggesting possible disorder. Some of these were restrained with RIGU and SIMU. Residual electron density near the diethylammonium ion suggested minor disorder, but no effort was made to model this.

(s18) Spek, A. L. Single-crystal structure validation with the program *PLATON*. *J. Appl. Cryst.* **2003**, *36*, 7-13.; Spek, A. L., Utrecht University, Utrecht, The Netherlands **2008**.

(s19) (a) Sheldrick, G.M. A short history of SHELX. *Acta Crystallogr.* **2008**, *A64*, 112-122. (b) Sheldrick, G. M. *SHELXT* – Integrated space-group and crystal-structure determination. *Acta Crystallogr.* **2015**, *A71*, 3-8. (c) Sheldrick, G. M. Crystal structure refinement with *SHELXL*. *Acta Crystallogr.* **2015**, *C71*, 3-8.

(s20) Dolomanov, O. V.; Bourhis, L. J.; Gildea, R. J.; Howard, J. A. K.; Puschmann, H. OLEX2: a complete structure solution, refinement and analysis program, *J. Appl. Cryst.* **2009**, *42*, 339-341.

(s21) The following additional description was recommended by a reviewer. (a) Data were collected on several crystals from different preparative batches using both Cu and Mo sources (depending upon the quality and size of the crystals; the best structure model collected using Mo is reported). All the structure models indicate the presence of a diethylammonium cation occupying the void created by the Pt<sub>4</sub> core. However, it was clear that there was only one location for I (viz., I1), occupying special position (1/3,2/3,0.199), which accounts for an occupancy of 0.3333. The elemental analysis given with the synthesis confirms the presence of a full iodine (Calcd. I,

4.32; Found: I, 4.43). Thus, iodine has been distributed at some of the residual electron density peaks with a restraint setting the total occupancy to 1. The Fourier difference maps show several additional residual electron density peaks near the disordered iodine suggesting the presence of partially occupied and or disordered solvent. At this point the reliability factors were  $R_1$  5.81 and  $wR_2$  19.07. Olex2 was used to mask the latter solvent molecules, which decreased the reliability factors significantly  $R_1$  5.06 and  $wR_2$  14.81. No further experiments or checks were carried out to determine the exact location(s) of the iodine atoms. A solvent mask was calculated and 401 electrons were found in a volume of 4447 Å<sup>3</sup> in 3 voids per unit cell. This is consistent with the presence of 1.5[CH<sub>2</sub>Cl<sub>2</sub>], 0.5[H<sub>2</sub>O] per asymmetric unit which accounts for 408 electrons per unit cell. (b) Residual electron density near diethylammonium ion suggested minor disorder. No efforts to model this disorder. Some of the phenyl groups and the terminal methyl groups showed elongated ellipsoids suggesting possible disorder. Some of these were restrained with RIGU and SIMU. Others were left alone, but these efforts reached a point of diminishing returns.

(s22) The following additional description was recommended by a reviewer. (a) Crystals of this complex were extremely unstable. Over 20 series of syntheses and crystallizations were carried out. Also, we tried soaking the crystals in several types of oil by themselves, saturated with the mother liquor, and the crystals in the mother liquor themselves. The crystals consistently lost solvent as they were picked and mounted on the cryo-stream. We also tried mounting the crystals at temperatures from 250 K to 110 K. In most cases, the crystals cracked. At room temperature, the crystals crumbled within a few seconds. The crystal that provided the reported data luckily survived at 110 K. However, analysis showed elongated ellipsoids on most of the atoms, suggesting whole molecule disorder. Significant residual electron density (8.1) near one of the Pt atoms also supports the assignment of whole molecule disorder. Given only half the molecule forms the asymmetric unit and the symmetry of the space group, attempts to model the disorder required large numbers of restraints and constraints. In addition, the solvent molecules could not be located from the residual electron density maps. Further, the final results with the disorder modeled and solvent MASKed using OLEX2 did afford improvement. For our final refinement, strong restraints and constraints were used to keep all the thermal ellipsoids meaningful, assuming no disorder. We also MASKED the partially occupied and or disordered solvents with OLEX2. The morpholinium ion was modelled with a cyclohexane template in OLEX2 and was strongly restrained to keep the

bond distances, angles, and thermal ellipsoids meaningful. (b) Given the complex instability of the crystal outside the mother liquor, this was the best result we could extract out of the compound. Efforts to mount the crystals in sealed glass capillaries and collect the data was also not fruitful. (c) The reported data were collected on a Cu source. We have also tried collecting the data on a Mo source. The results were similar, but not any better.

(s23) The following additional description was recommended by a reviewer. (a) The crystal used was grown in layered  $\text{CHCl}_3$  and toluene. Trials with many other solvent mixtures including  $\text{CH}_2\text{Cl}_2$  and hexanes and other options produced crystals that were extremely unstable. In spite of trials using different oils as protectants, the crystals died as they were picked and mounted at 110 K. (b) Data were also collected at 250 K (suspecting a phase transition at lower temperature), but this did not help. In some of the crystals the diffraction quality worsened as the data were collected. This was attributed to solvent loss outside the mother liquor, even at 110 K. (c) A few rare crystals survived and the one used was one of the better in this series. Nonetheless, the data indicated significant disorder as well as partial solvent occupancy. (d) In addition, there were a few strong residual electron density peaks, which possibly indicate either residual starting material or product with partial loss of solvent coexisting in the structure. Whole molecule disorder remains another possibility. Although we have successfully located and modeled part of the solvents (chloroform and toluene, with elongated ellipsoids), some of the partially occupied and/or disordered solvent could not be located. These were SQUEEZED using PLATON. (e) Elongated ellipsoids on some of the terminal atoms possibly indicated disorder. No efforts were made to model this disorder. Similarly, elongated ellipsoids associated with the  $n\text{-propyl}_2\text{N}^+$  moiety suggested disorder but this was not modeled in view of diminishing returns. (f) Strong residual electron densities were present at the locations assigned as Pt5 and Pt6 (dummy atoms with partial occupancies 0.11 and 0.03). Removing these atoms made the  $(n\text{-propyl})_2\text{N}^+$  ion unstable, drifting towards the Pt5 and Pt6 locations. Pt5 and Pt6 are thought to be connected to factors noted above (residual reactant, product with partial solvent loss, whole molecule disorder, etc.). The  $(n\text{-propyl})_2\text{N}^+$  moieties were not squeezed as they are part of the charge balance.

**Table s1.** General crystallographic data.

| complex                                               | <b>1·Ha<sup>+</sup>Γ<sup>-</sup>·1.62CH<sub>2</sub>Cl<sub>2</sub><sup>a</sup></b>             | <b>1·Hc<sup>+</sup>Cl<sup>-</sup><sup>a</sup></b>               | <b>2·Hb<sup>+</sup>Γ<sup>-</sup>·(3.75CHCl<sub>3</sub>)(2.83C<sub>7</sub>H<sub>8</sub>)<sup>a</sup></b> |
|-------------------------------------------------------|-----------------------------------------------------------------------------------------------|-----------------------------------------------------------------|---------------------------------------------------------------------------------------------------------|
| empirical formula                                     | C <sub>137.62</sub> H <sub>129.24</sub> Cl <sub>3.24</sub> I <sub>1.01</sub> NPt <sub>8</sub> | C <sub>136</sub> H <sub>130</sub> ClNPt <sub>8</sub>            | C <sub>169.56</sub> H <sub>174.39</sub> Cl <sub>11.25</sub> INP <sub>8</sub> Pt <sub>4.14</sub>         |
| formula weight                                        | 3068.45                                                                                       | 2857.97                                                         | 3807.35                                                                                                 |
| temperature [K]                                       | 110.0                                                                                         | 110.0                                                           | 110.0                                                                                                   |
| diffractometer                                        | Bruker QUEST                                                                                  | Bruker VENTURE                                                  | Bruker QUEST                                                                                            |
| wavelength [Å]                                        | 0.71073                                                                                       | 1.54178                                                         | 0.71073                                                                                                 |
| crystal system                                        | Trigonal                                                                                      | Monoclinic                                                      | Triclinic                                                                                               |
| space group                                           | P-3                                                                                           | C2/c                                                            | P-1                                                                                                     |
| unit cell dimensions:                                 |                                                                                               |                                                                 |                                                                                                         |
| <i>a</i> [Å]                                          | 35.0101(8)                                                                                    | 25.3077(14)                                                     | 18.8201(16)                                                                                             |
| <i>b</i> [Å]                                          | 35.0101(8)                                                                                    | 26.3723(14)                                                     | 19.0800(15)                                                                                             |
| <i>c</i> [Å]                                          | 21.4586(5)                                                                                    | 21.7373(12)                                                     | 26.635(2)                                                                                               |
| α [°]                                                 | 90                                                                                            | 90                                                              | 79.217(3)                                                                                               |
| β [°]                                                 | 90                                                                                            | 90.009(3)                                                       | 76.791(3)                                                                                               |
| γ [°]                                                 | 120                                                                                           | 90                                                              | 71.491(3)                                                                                               |
| <i>V</i> [Å <sup>3</sup> ]                            | 22778.1(12)                                                                                   | 14508.0(14)                                                     | 8761.3(13)                                                                                              |
| <i>Z</i>                                              | 6                                                                                             | 4                                                               | 2                                                                                                       |
| ρ <sub>calc</sub> [Mg/m <sup>3</sup> ]                | 1.342                                                                                         | 1.308                                                           | 1.443                                                                                                   |
| μ [mm <sup>-1</sup> ]                                 | 4.061                                                                                         | 8.372                                                           | 3.762                                                                                                   |
| <i>F</i> (000)                                        | 9016                                                                                          | 5640                                                            | 3772                                                                                                    |
| crystal size [mm <sup>3</sup> ]                       | 0.049 × 0.034 × 0.021                                                                         | 0.109 × 0.102 × 0.045                                           | 0.142 × 0.031 × 0.024                                                                                   |
| Θ limit [°]                                           | 1.777 to 25.019                                                                               | 2.420 to 70.258                                                 | 1.749 to 27.508                                                                                         |
| index range ( <i>h</i> , <i>k</i> , <i>l</i> )        | −41, 41; −41, 41; −25, 25                                                                     | −30, 30; −32, 32; −26, 26                                       | −24, 24; −24, 24; −34, 34                                                                               |
| reflections collected                                 | 528742                                                                                        | 142334                                                          | 492199                                                                                                  |
| independent reflections                               | 26831 [R(int) = 0.0807]                                                                       | 13825 [R(int) = 0.0646]                                         | 40243 [R(int) = 0.0683]                                                                                 |
| completeness to Θ                                     | 100.0                                                                                         | 100.0                                                           | 100.0                                                                                                   |
| max. and min. transmission                            | 0.4286 and 0.2722                                                                             | 0.3841 and 0.1542                                               | 0.1864 and 0.1313                                                                                       |
| data/restraints/parameters                            | 26831 / 336 / 1445                                                                            | 13825 / 1084 / 620                                              | 40243 / 244 / 1773                                                                                      |
| goodness-of-fit on <i>F</i> <sup>2</sup>              | 1.049                                                                                         | 1.052                                                           | 1.109                                                                                                   |
| <i>R</i> indices (final) [ <i>I</i> > 2σ( <i>I</i> )] | <i>R</i> <sub>1</sub> = 0.0506, <i>wR</i> <sub>1</sub> = 0.1286                               | <i>R</i> <sub>1</sub> = 0.0615, <i>wR</i> <sub>1</sub> = 0.1677 | <i>R</i> <sub>1</sub> = 0.0398, <i>wR</i> <sub>1</sub> = 0.1138                                         |
| <i>R</i> indices (all data)                           | <i>R</i> <sub>2</sub> = 0.0732, <i>wR</i> <sub>2</sub> = 0.1481                               | <i>R</i> <sub>2</sub> = 0.0640, <i>wR</i> <sub>2</sub> = 0.1703 | <i>R</i> <sub>2</sub> = 0.0552, <i>wR</i> <sub>2</sub> = 0.1190                                         |
| largest diff. peak and hole [eÅ <sup>-3</sup> ]       | 2.107 and −1.103                                                                              | 8.094 and −2.333                                                | 4.522 and −1.690                                                                                        |

<sup>a</sup>For all three salts, additional solvate molecules were present that were MASKED or SQUEEZED (see experimental section). Thus, the empirical formulae are misleading and some densities may be underestimated.

**Table s2.** Key crystallographic distances [Å] and angles [°] for Pt<sub>4</sub>C<sub>16</sub> complexes.

|             | <b>1·Ha<sup>+</sup>Γ<sup>-</sup>·1.62CH<sub>2</sub>Cl<sub>2</sub></b> | <b>1·Hc<sup>+</sup>Cl<sup>-</sup></b> | <b>2·Hb<sup>+</sup>I<sup>-</sup>·(3.75CHCl<sub>3</sub>)·(2.83C<sub>7</sub>H<sub>8</sub>)</b> |
|-------------|-----------------------------------------------------------------------|---------------------------------------|----------------------------------------------------------------------------------------------|
| Pt1-C1      | 2.006(8)                                                              | 2.002(8)                              | 2.019(5)                                                                                     |
| Pt1-C16     | 2.006(8)                                                              | 1.992(6)                              | 2.004(5)                                                                                     |
| Pt2-C4      | 1.991(9)                                                              | 1.997(8)                              | 2.006(5)                                                                                     |
| Pt2-C5      | 1.985(9)                                                              | 1.990(7)                              | 2.008(5)                                                                                     |
| Pt3-C8      | 2.017(8)                                                              | 1.992(6)                              | 2.003(5)                                                                                     |
| Pt3-C9      | 2.005(7)                                                              | 2.002(8)                              | 1.998(5)                                                                                     |
| Pt4-C12     | 1.994(7)                                                              | 1.997(8)                              | 2.010(5)                                                                                     |
| Pt4-C13     | 2.030(9)                                                              | 1.990(7)                              | 2.007(5)                                                                                     |
| Avg Pt-C    | 2.004(14) <sup>a</sup>                                                | 1.996(4)                              | 2.007(6)                                                                                     |
| Pt1-P1      | 2.284(2)                                                              | 2.275(18)                             | 2.273(13)                                                                                    |
| Pt1-P2      | 2.291(2)                                                              | 2.271(17)                             | 2.275(12)                                                                                    |
| Pt2-P3      | 2.277(3)                                                              | 2.272(19)                             | 2.278(13)                                                                                    |
| Pt2-P4      | 2.273(3)                                                              | 2.277(2)                              | 2.276(13)                                                                                    |
| Pt3-P5      | 2.283(19)                                                             | 2.275(18)                             | 2.283(12)                                                                                    |
| Pt3-P6      | 2.281(2)                                                              | 2.271(17)                             | 2.284(12)                                                                                    |
| Pt4-P7      | 2.289(2)                                                              | 2.272(19)                             | 2.281(12)                                                                                    |
| Pt4-P8      | 2.270(2)                                                              | 2.277(2)                              | 2.289(12)                                                                                    |
| Avg Pt-P    | 2.281(7) <sup>a</sup>                                                 | 2.274(2)                              | 2.280(5)                                                                                     |
| C1≡C2       | 1.210(12)                                                             | 1.208(11)                             | 1.203(7)                                                                                     |
| C2-C3       | 1.391(13)                                                             | 1.384(11)                             | 1.378(7)                                                                                     |
| C3≡C4       | 1.202(12)                                                             | 1.205(12)                             | 1.205(7)                                                                                     |
| C5≡C6       | 1.214(12)                                                             | 1.221(10)                             | 1.199(7)                                                                                     |
| C6-C7       | 1.391(12)                                                             | 1.373(10)                             | 1.399(7)                                                                                     |
| C7≡C8       | 1.190(11)                                                             | 1.205(9)                              | 1.208(7)                                                                                     |
| C9≡C10      | 1.211(10)                                                             | 1.208(11)                             | 1.215(7)                                                                                     |
| C10-C11     | 1.371(11)                                                             | 1.384(11)                             | 1.381(7)                                                                                     |
| C11≡C12     | 1.217(11)                                                             | 1.205(12)                             | 1.206(7)                                                                                     |
| C13≡C14     | 1.194(12)                                                             | 1.221(10)                             | 1.202(7)                                                                                     |
| C14-C15     | 1.194(12)                                                             | 1.373(10)                             | 1.373(7)                                                                                     |
| C15≡C16     | 1.195(12)                                                             | 1.205(9)                              | 1.208(7)                                                                                     |
| Avg C≡C     | 1.204(10) <sup>a</sup>                                                | 1.210(7)                              | 1.206(5)                                                                                     |
| C16-Pt1-C1  | 87.9(3)                                                               | 87.1(3)                               | 85.7(2)                                                                                      |
| C4-Pt2-C5   | 86.2(3)                                                               | 85.2(3)                               | 87.0(2)                                                                                      |
| C8-Pt3-C9   | 89.7(3)                                                               | 87.1(3)                               | 88.2(19)                                                                                     |
| C12-Pt4-C13 | 85.9(3)                                                               | 85.2(3)                               | 86.2(19)                                                                                     |

**Table s2.** (Continued)

|                                             | <b>1·Ha<sup>+</sup>I<sup>-</sup>·1.62CH<sub>2</sub>Cl<sub>2</sub></b> | <b>1·Hc<sup>+</sup>Cl<sup>-</sup></b> | <b>2·Hb<sup>+</sup>I<sup>-</sup>·(3.75CHCl<sub>3</sub>)(2.83C<sub>7</sub>H<sub>8</sub>)</b> |
|---------------------------------------------|-----------------------------------------------------------------------|---------------------------------------|---------------------------------------------------------------------------------------------|
| Avg C-Pt-C                                  | 87.4(2) <sup>a</sup>                                                  | 86.2(1)                               | 86.8(1)                                                                                     |
| Pt1-C1-C2                                   | 177.2(8)                                                              | 176.9(7)                              | 174.4(5)                                                                                    |
| C1-C2-C3                                    | 178.5(9)                                                              | 174.7(10)                             | 177.1(6)                                                                                    |
| C2-C3-C4                                    | 179.4(12)                                                             | 175.9(10)                             | 178.7(6)                                                                                    |
| C3-C4-Pt2                                   | 175.5(8)                                                              | 176.0(8)                              | 178.5(5)                                                                                    |
| Pt2-C5-C6                                   | 174.3(8)                                                              | 174.8(7)                              | 173.8(5)                                                                                    |
| C5-C6-C7                                    | 177.0(10)                                                             | 174.8(8)                              | 179.8(7)                                                                                    |
| C6-C7-C8                                    | 177.7(10)                                                             | 174.3(7)                              | 178.4(5)                                                                                    |
| C7-C8-Pt3                                   | 170.6(8)                                                              | 170.9(6)                              | 172.3(4)                                                                                    |
| Pt3-C9-C10                                  | 175.3(7)                                                              | 176.9(7)                              | 179.7(5)                                                                                    |
| C9-C10-C11                                  | 178.2(8)                                                              | 174.7(10)                             | 178.5(5)                                                                                    |
| C10-C11-C12                                 | 178.8(9)                                                              | 175.9(10)                             | 178.3(6)                                                                                    |
| C11-C12-Pt4                                 | 171.6(7)                                                              | 176.0(8)                              | 175.6(4)                                                                                    |
| Pt4-C13-C14                                 | 174.8(8)                                                              | 174.8(7)                              | 174.4(5)                                                                                    |
| C13-C14-C15                                 | 177.8(11)                                                             | 174.8(8)                              | 175.5(6)                                                                                    |
| C14-C15-C16                                 | 177.8(9)                                                              | 174.3(7)                              | 176.8(6)                                                                                    |
| C15-C16-Pt1                                 | 178.4(8)                                                              | 170.9(6)                              | 178.6(5)                                                                                    |
| Pt4-Pt1-Pt2 vs.<br>Pt2-Pt3-Pt4 <sup>b</sup> | 144                                                                   | 96                                    | 135                                                                                         |
| Pt1-Pt2 <sup>c</sup>                        | 7.797                                                                 | 7.748                                 | 7.803                                                                                       |
| Pt1-Pt4                                     | 7.782                                                                 | 7.676                                 | 7.762                                                                                       |
| Pt2-Pt3                                     | 7.757                                                                 | 7.676                                 | 7.799                                                                                       |
| Pt3-Pt4                                     | 7.784                                                                 | 7.748                                 | 7.807                                                                                       |
| Pt1-Pt3                                     | 10.318                                                                | 8.735                                 | 10.505                                                                                      |
| Pt2-Pt4                                     | 11.154                                                                | 9.961                                 | 10.653                                                                                      |

<sup>a</sup> This represents the standard deviation of the averaged values. <sup>b</sup> Plane/plane angle. <sup>c</sup> The atom numbers have not been changed from those in the CIF file. In all case Pt2-Pt4 represents the longest platinum-platinum distance, as opposed to Pt1-Pt3 in the previous publication.<sup>s1</sup>

**Table s3.** Hydrogen bonding interactions: short NH and NCH contacts to Pt<sub>4</sub>C<sub>16</sub> macrocycles (cutoff  $\leq 4$  Å; the NH protons are arbitrarily designated with upper case letters (A, B, C), and NCH protons with lower case letters (a, b, c, d).

| NH...C <sub>sp</sub>                                                                        | NH...(C≡C) <sub>centroid</sub> | NCH...C <sub>sp</sub> | NCH...(C≡C) <sub>centroid</sub> |
|---------------------------------------------------------------------------------------------|--------------------------------|-----------------------|---------------------------------|
| <b>1·Ha<sup>+</sup>I<sup>-</sup>·1.62CH<sub>2</sub>Cl<sub>2</sub></b>                       |                                |                       |                                 |
| 3.60 (HA/C7)                                                                                | 3.44 (HA/C7≡C8)                | 2.84 (Ha/C1)          | 2.61 (Ha/C1≡C2)                 |
| 3.37 (HA/C8)                                                                                |                                | 2.50 (Ha/C2)          |                                 |
| 2.62 (HA/C9)                                                                                | 2.41 (HA/C9≡C10)               | 2.80 (Ha/C3)          | 3.13 (Ha/C3≡C4)                 |
| 2.35 (HA/C10)                                                                               |                                | 3.52 (Ha/C4)          |                                 |
| 3.13 (HB/C11)                                                                               | 3.22 (HB/C11≡C12)              | 3.58 (Ha/C15)         | 3.49 (Ha/C15≡C16)               |
| 3.42 (HB/C12)                                                                               |                                | 3.50 (Ha/C16)         |                                 |
| 3.06 (HB/C13)                                                                               | 2.84 (HB/C13≡C14)              | 3.28 (Hb/C3)          | 3.14 (Hb/C3≡C4)                 |
| 2.73 (HB/C14)                                                                               |                                | 3.46 (Hb/C4)          |                                 |
|                                                                                             |                                | 3.13 (Hb/C5)          | 2.83 (Hb/C5≡C6)                 |
|                                                                                             |                                | 2.64 (Hb/C6)          |                                 |
|                                                                                             |                                | 2.68 (Hb/C7)          | 2.92 (Hb/C7≡C8)                 |
|                                                                                             |                                | 3.25 (Hb/C8)          |                                 |
|                                                                                             |                                | 3.58 (Hc/C7)          | 3.56 (Hc/C7≡C8)                 |
|                                                                                             |                                | 3.64 (Hc/C8)          |                                 |
|                                                                                             |                                | 3.48 (Hd/C9)          | 3.94 (Hd/C9≡C10)                |
|                                                                                             |                                | 3.34 (Hd/C10)         |                                 |
|                                                                                             |                                | 3.65 (Hd/C11)         | 3.36 (Hd/C11≡C12)               |
|                                                                                             |                                | 4.30 (Hd/C12)         |                                 |
| <b>1·Hc<sup>+</sup>Cl<sup>-</sup></b>                                                       |                                |                       |                                 |
| 2.77 (HA/C15)                                                                               | 2.59 (HA/C15≡C16)              | 2.98 (Ha/C1)          | 2.85 (Ha/C1≡C2)                 |
| 2.55 (HA/C16)                                                                               |                                | 2.85 (Ha/C2)          |                                 |
| 2.52 (HA/C1)                                                                                | 2.48 (HA/C1≡C2)                | 3.19 (Ha/C3)          | 3.46 (Ha/C3≡C4)                 |
| 2.59 (HA/C2)                                                                                |                                | 3.82 (Ha/C4)          |                                 |
| 3.03 (HB/C3)                                                                                | 3.10 (HB/C3≡C4)                | 3.94 (Hb/C5)          | 3.62 (Hb/C5≡C6)                 |
| 3.28 (HB/C4)                                                                                |                                | 3.38 (Hb/C6)          |                                 |
| 3.10 (HB/C5)                                                                                | 2.89 (HB/C5≡C6)                | 3.13 (Hb/C7)          | 3.17 (Hb/C7≡C8)                 |
| 2.80 (HB/C6)                                                                                |                                | 3.31 (Hb/C8)          |                                 |
|                                                                                             |                                | 2.77 (Hc/C7)          | 2.59 (Hc/C7≡C8)                 |
|                                                                                             |                                | 2.55 (Hc/C8)          |                                 |
|                                                                                             |                                | 2.52 (Hc/C9)          | 2.48 (Hc/C9≡C10)                |
|                                                                                             |                                | 2.59 (Hc/C10)         |                                 |
|                                                                                             |                                | 3.03 (Hd/C11)         | 3.10 (Hd/C11≡C12)               |
|                                                                                             |                                | 3.28 (Hd/C12)         |                                 |
|                                                                                             |                                | 3.10 (Hd/C13)         | 2.89 (Hd/C13≡C14)               |
|                                                                                             |                                | 2.80 (Hd/C14)         |                                 |
| <b>2·Hb<sup>+</sup>I<sup>-</sup>·(3.75CHCl<sub>3</sub>)(2.83C<sub>7</sub>H<sub>8</sub>)</b> |                                |                       |                                 |
| 3.51 (HA/C11)                                                                               | 3.68 (HA/C11≡C12)              | 3.36 (Ha/C1)          | 2.97 (Ha/C1≡C2)                 |
| 3.93 (HA/C12)                                                                               |                                | 2.67 (Ha/C2)          |                                 |

**Table s3.** (Continued)

| NH...C <sub>sp</sub> | NH...(C≡C) <sub>centroid</sub> | NCH...C <sub>sp</sub> | NCH...(C≡C) <sub>centroid</sub> |
|----------------------|--------------------------------|-----------------------|---------------------------------|
| 3.94 (HA/C13)        | 3.71 (HA/C13≡C14)              | 2.50 (Ha/C3)          | 2.66 (Ha/C3≡C4)                 |
| 3.57 (HA/C14)        |                                | 2.94 (Ha/C4)          |                                 |
| 2.71 (HB/C15)        | 2.70 (HB/C15≡C16)              | 3.54 (Ha/C5)          | 3.46 (Ha/C5≡C6)                 |
| 2.83 (HB/C16)        |                                | 3.47 (Ha/C6)          |                                 |
| 3.20 (HB/C1)         | 3.14 (HB/C1≡C2)                | 3.44 (Hb/C5)          | 3.10 (Hb/C5≡C6)                 |
| 3.18 (HB/C2)         |                                | 2.85 (Hb/C6)          |                                 |
|                      |                                | 2.72 (Hb/C7)          | 2.88 (Hb/C7≡C8)                 |
|                      |                                | 3.15 (Hb/C8)          |                                 |
|                      |                                | 3.74 (Hb/C9)          | 3.69 (Hb/C9≡C10)                |
|                      |                                | 3.73 (Hb/C10)         |                                 |
|                      |                                | 3.97 (Hc/C1)          | 3.68 (Hc/C1≡C2)                 |
|                      |                                | 3.46 (Hc/C2)          |                                 |
|                      |                                | 3.41 (Hc/C3)          | 3.57 (Hc/C3≡C4)                 |
|                      |                                | 3.82 (Hc/C4)          |                                 |

**Table s4.** Short N and NC contacts to Pt<sub>4</sub>C<sub>16</sub> macrocycles (cutoff  $\leq 4$  Å; the NC carbons are arbitrarily designated with upper case letters A, B).

| N...C <sub>sp</sub>                                                                         | N...(C≡C) <sub>centroid</sub> | NC...C <sub>sp</sub> | NC...(C≡C) <sub>centroid</sub> |
|---------------------------------------------------------------------------------------------|-------------------------------|----------------------|--------------------------------|
| <b>1·Ha<sup>+</sup>I<sup>-</sup>·1.62CH<sub>2</sub>Cl<sub>2</sub></b>                       |                               |                      |                                |
| 3.94 (N/C7)                                                                                 | 3.88 (N/C7≡C8)                | 3.81 (CA/C1)         | 3.55 (CA/C1≡C2)                |
| 3.91 (N/C8)                                                                                 |                               | 3.37 (CA/C2)         |                                |
| 3.48 (N/C9)                                                                                 | 3.27 (N/C9≡C10)               | 3.37 (CA/C3)         | 3.55 (CA/C3≡C4)                |
| 3.17 (N/C10)                                                                                |                               | 3.82 (CA/C4)         |                                |
| 3.31 (N/C11)                                                                                | 3.56 (N/C11≡C12)              | 3.94 (CA/C5)         | 3.69 (CA/C5≡C6)                |
| 3.89 (N/C12)                                                                                |                               | 3.52 (CA/C6)         |                                |
| 3.95 (N/C13)                                                                                | 3.75 (N/C13≡C14)              | 3.49 (CA/C7)         | 3.66 (CA/C7≡C8)                |
| 3.64 (N/C14)                                                                                |                               | 3.91 (CA/C8)         |                                |
|                                                                                             |                               | 3.90 (CB/C9)         | 3.79 (CB/C9≡C10)               |
|                                                                                             |                               | 3.77 (CB/C10)        |                                |
| <b>1·Hc<sup>+</sup>Cl<sup>-</sup></b>                                                       |                               |                      |                                |
| 3.43 (N/C1)                                                                                 | 3.28 (N/C1≡C2)                | 3.53 (CA/C1)         | 3.44 (CA/C1≡C2)                |
| 3.25 (N/C2)                                                                                 |                               | 3.45 (CA/C2)         |                                |
| 3.44 (N/C3)                                                                                 | 3.64 (N/C3≡C4)                | 3.72 (CA/C3)         | 3.95 (CA/C3≡C4)                |
| 3.93 (N/C4)                                                                                 |                               | 4.25 (CA/C4)         |                                |
| 3.91 (N/C5)                                                                                 | 3.65 (N/C5≡C6)                | 3.55 (CB/C7)         | 3.49 (CB/C7≡C8)                |
| 3.48 (N/C6)                                                                                 |                               | 3.53 (CB/C8)         |                                |
| 3.43 (N/C7)                                                                                 | 3.56 (N/C7≡C8)                | 3.43 (CB/C9)         | 3.28 (CB/C9≡C10)               |
| 3.78 (N/C8)                                                                                 |                               | 3.25 (CB/C10)        |                                |
|                                                                                             |                               | 3.44 (CB/C11)        | 3.64 (CB/C11≡C12)              |
|                                                                                             |                               | 3.93 (CB/C12)        |                                |
| <b>2·Hb<sup>+</sup>I<sup>-</sup>·(3.75CHCl<sub>3</sub>)(2.83C<sub>7</sub>H<sub>8</sub>)</b> |                               |                      |                                |
| 3.86 (N/C1)                                                                                 | 3.68 (N/C1≡C2)                | 4.04 (CA/C1)         | 3.75 (CA/C1≡C2)                |
| 3.60 (N/C2)                                                                                 |                               | 3.54 (CA/C2)         |                                |
| 3.52 (N/C15)                                                                                | 3.58 (N/C15≡C16)              | 3.49 (CA/C3)         | 3.64 (CA/C3≡C4)                |
| 3.74 (N/C16)                                                                                |                               | 3.88 (CA/C4)         |                                |
|                                                                                             |                               | 3.97 (CA/C5)         | 3.75 (CA/C5≡C6)                |
|                                                                                             |                               | 3.61 (CA/C6)         |                                |
|                                                                                             |                               | 3.67 (CA/C7)         | 3.86 (CA/C7≡C8)                |
|                                                                                             |                               | 4.12 (CA/C8)         |                                |
|                                                                                             |                               | 4.06 (CB/C1)         | 3.89 (CB/C1≡C2)                |
|                                                                                             |                               | 3.80 (CB/C2)         |                                |

**Table s5.** Diffusion coefficients (D) derived from DOSY  $^1\text{H}$  NMR experiments in  $\text{CDCl}_3$ .

| complex                                            | $\text{CDCl}_3$ |                                              | $\text{CD}_2\text{Cl}_2$ |                                              |
|----------------------------------------------------|-----------------|----------------------------------------------|--------------------------|----------------------------------------------|
|                                                    | signal (ppm)    | $D \times 10^{10} (\text{m}^2\text{s}^{-1})$ | signal (ppm)             | $D \times 10^{10} (\text{m}^2\text{s}^{-1})$ |
| <b>1·Ha<sup>+</sup>I<sup>-</sup></b>               | 7.63            | $4.05 \pm 0.01$                              | 7.64                     | $9.69 \pm 0.09$                              |
|                                                    | 7.19            | $3.96 \pm 0.01$                              | 7.29                     | $10.16 \pm 0.20$                             |
|                                                    | 7.04            | $3.99 \pm 0.01$                              | 7.17                     | $9.79 \pm 0.17$                              |
|                                                    | 3.79            | $4.05 \pm 0.04$                              | —                        | —                                            |
|                                                    | 2.22            | $4.00 \pm 0.01$                              | 2.27                     | $9.51 \pm 0.13$                              |
|                                                    | 1.57            | $4.00 \pm 0.02$                              | 1.35                     | $10.10 \pm 0.09$                             |
|                                                    | 0.70            | $3.97 \pm 0.01$                              | 0.67                     | $9.57 \pm 0.18$                              |
| <b>1·(Hc<sup>+</sup>I<sup>-</sup>)<sub>3</sub></b> | 7.65            | $4.33 \pm 0.02$                              | 7.65                     | $8.38 \pm 0.10$                              |
|                                                    | 7.24            | $4.31 \pm 0.02$                              | 7.30                     | $8.45 \pm 0.15$                              |
|                                                    | 7.08            | $4.23 \pm 0.03$                              | 7.21                     | $8.64 \pm 0.14$                              |
|                                                    | 3.52            | $8.73 \pm 0.04$                              | 3.53                     | $17.19 \pm 0.12$                             |
|                                                    | 2.95            | $8.83 \pm 0.05$                              | 2.94                     | $17.21 \pm 0.08$                             |
|                                                    | 2.33            | $4.36 \pm 0.02$                              | 2.33                     | $8.52 \pm 0.13$                              |
|                                                    | 0.62            | $4.29 \pm 0.03$                              | 0.63                     | $8.60 \pm 0.14$                              |
| <b>2·Ha<sup>+</sup>I<sup>-</sup></b>               | 7.66            | $3.75 \pm 0.01$                              |                          |                                              |
|                                                    | 7.19            | $3.76 \pm 0.01$                              |                          |                                              |
|                                                    | 7.03            | $3.78 \pm 0.01$                              |                          |                                              |
|                                                    | 3.82            | $3.76 \pm 0.02$                              |                          |                                              |
|                                                    | 2.22            | $3.79 \pm 0.01$                              |                          |                                              |
|                                                    | 1.61            | $3.79 \pm 0.01$                              |                          |                                              |
|                                                    | 1.10            | $3.78 \pm 0.01$                              |                          |                                              |
| <b>2·Hb<sup>+</sup>I<sup>-</sup></b>               | 0.21            | $3.75 \pm 0.02$                              |                          |                                              |
|                                                    | 7.68            | $4.07 \pm 0.08$                              |                          |                                              |
|                                                    | 7.21            | $3.94 \pm 0.10$                              |                          |                                              |
|                                                    | 7.05            | $4.02 \pm 0.10$                              |                          |                                              |
|                                                    | 6.27            | $4.63 \pm 0.09$                              |                          |                                              |
|                                                    | 5.86            | $4.75 \pm 0.10$                              |                          |                                              |
|                                                    | 5.42            | $4.73 \pm 0.10$                              |                          |                                              |
|                                                    | 4.43            | $4.76 \pm 0.09$                              |                          |                                              |
|                                                    | 2.22            | $4.09 \pm 0.08$                              |                          |                                              |
|                                                    | 1.10            | $4.02 \pm 0.09$                              |                          |                                              |
| <b>2·(Hd<sup>+</sup>I<sup>-</sup>)<sub>3</sub></b> | 0.22            | $4.10 \pm 0.07$                              |                          |                                              |
|                                                    | 7.64            | $4.03 \pm 0.02$                              | 7.65                     | $8.06 \pm 0.11$                              |
|                                                    | 7.24            | $4.06 \pm 0.01$                              | 7.29                     | $8.22 \pm 0.15$                              |
|                                                    | 7.08            | $4.07 \pm 0.01$                              | 7.16                     | $8.14 \pm 0.13$                              |
|                                                    | 3.05            | $7.40 \pm 0.03$                              | 3.01                     | $17.41 \pm 0.11$                             |
|                                                    | 2.23            | $4.02 \pm 0.01$                              | 2.27                     | $8.00 \pm 0.11$                              |
|                                                    | 1.19            | $7.32 \pm 0.03$                              | 1.19                     | $16.87 \pm 0.16$                             |
|                                                    | 1.07            | $4.14 \pm 0.02$                              | 1.08                     | $8.17 \pm 0.13$                              |
|                                                    | 0.20            | $4.01 \pm 0.02$                              | 0.23                     | $8.11 \pm 0.11$                              |

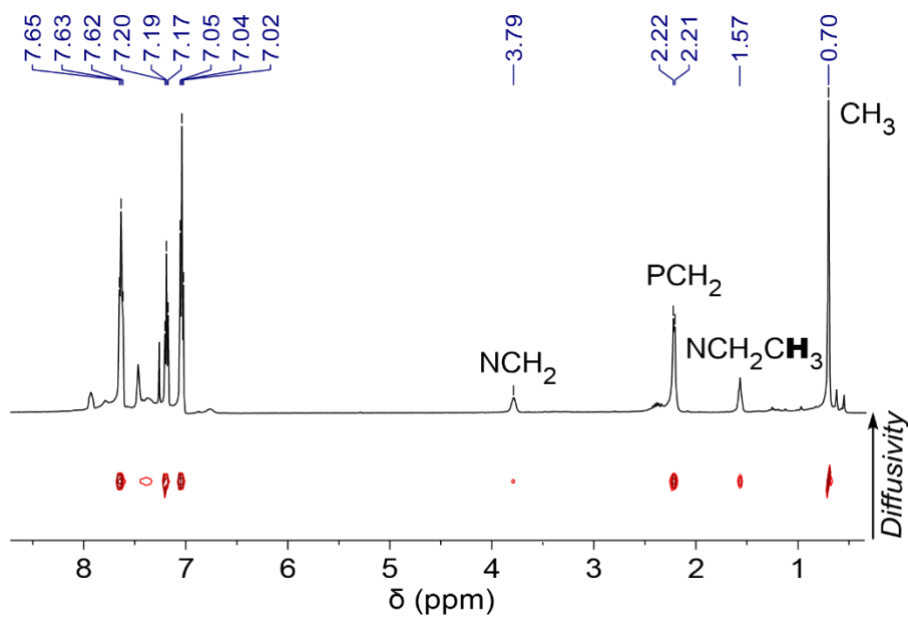

**Figure s4.** DOSY  $^1\text{H}$  NMR plot (500 MHz,  $\text{CDCl}_3$ ) of  $1 \cdot \text{Ha}^+\text{I}^-$  (full version, Figure 3 in main text).

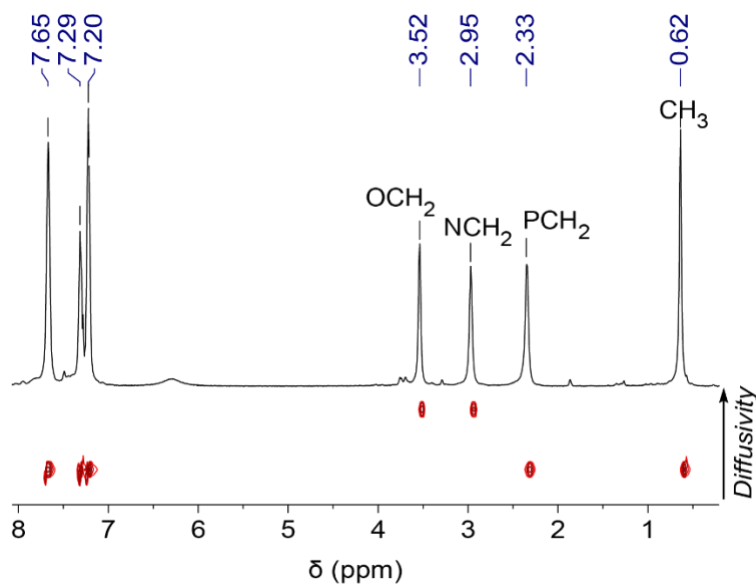

**Figure s5.** DOSY  $^1\text{H}$  NMR plot (500 MHz,  $\text{CDCl}_3$ ) of  $1 \cdot (\text{Hc}^+\text{I}^-)_3$ .

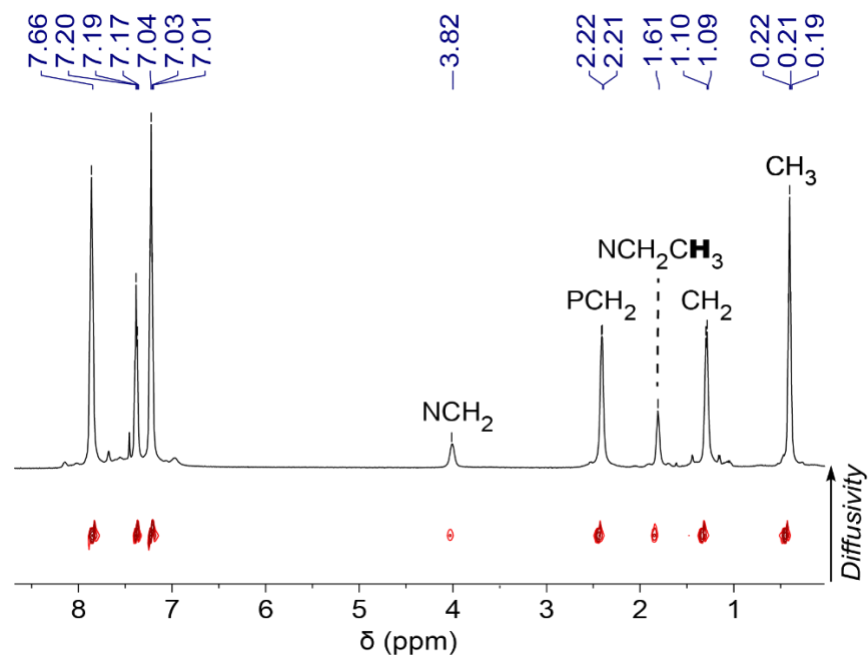

**Figure s6.** DOSY  $^1\text{H}$  NMR plot (500 MHz,  $\text{CDCl}_3$ ) of  $2\cdot\text{Ha}^+\text{I}^-$  (full version, Figure 3 in main text).

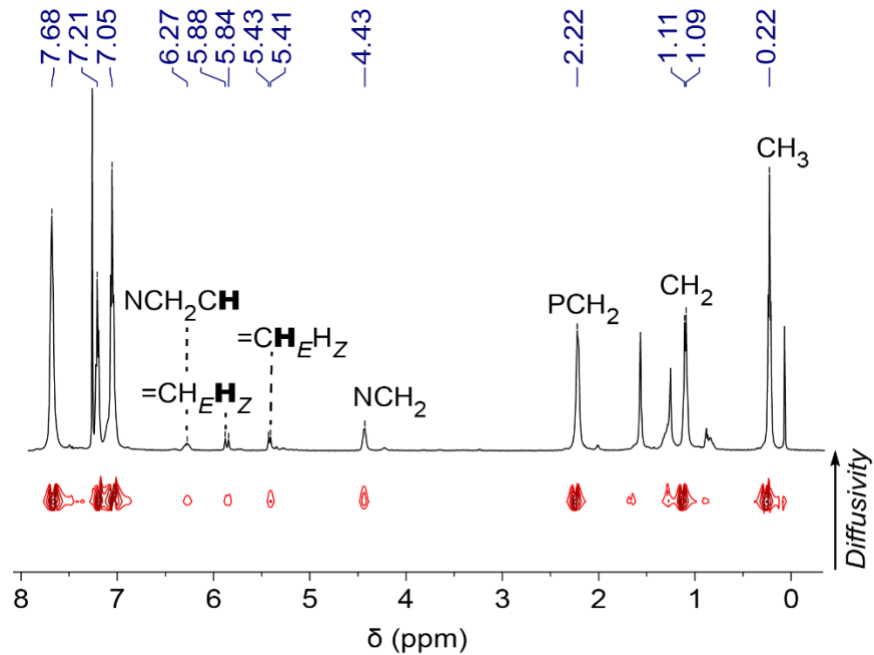

**Figure s7.** DOSY  $^1\text{H}$  NMR plot (500 MHz,  $\text{CDCl}_3$ ) of  $2\cdot\text{Hb}^+\text{I}^-$ .

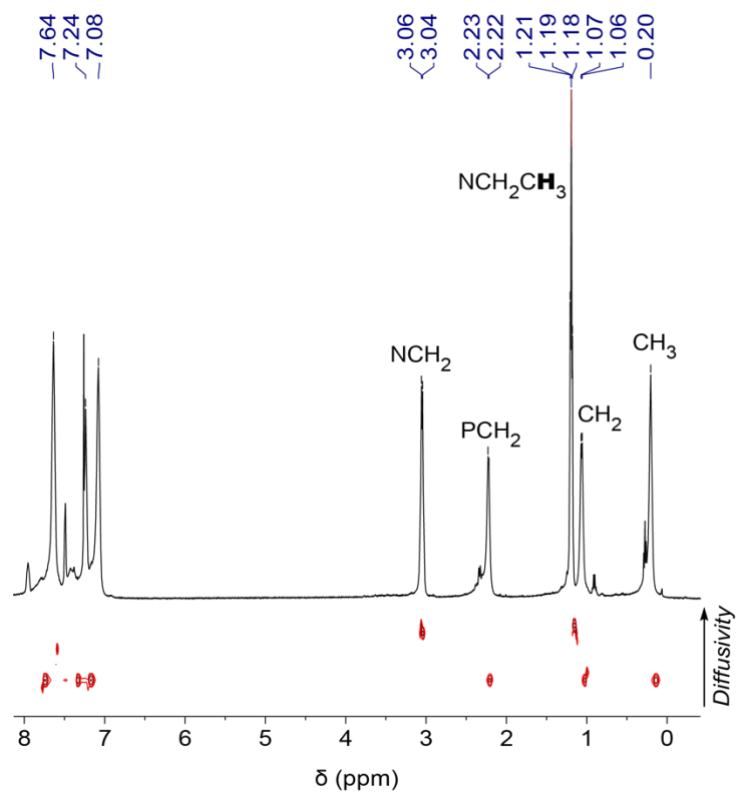

**Figure s8.** DOSY  $^1\text{H}$  NMR plot (500 MHz,  $\text{CDCl}_3$ ) of  $2 \cdot (\text{Hd}^+\text{I}^-)_3$ .

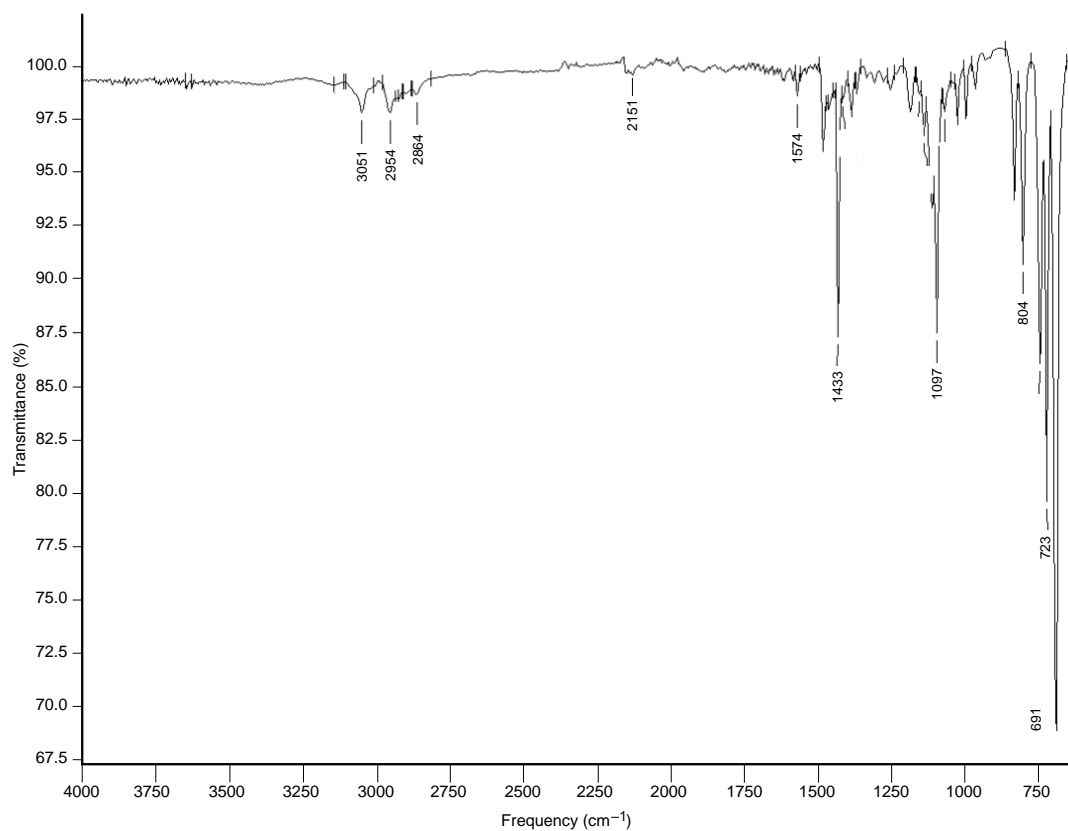

**Figure s9.** Representative IR spectrum ( $1 \cdot \text{Ha}^+\text{I}^-$ ).

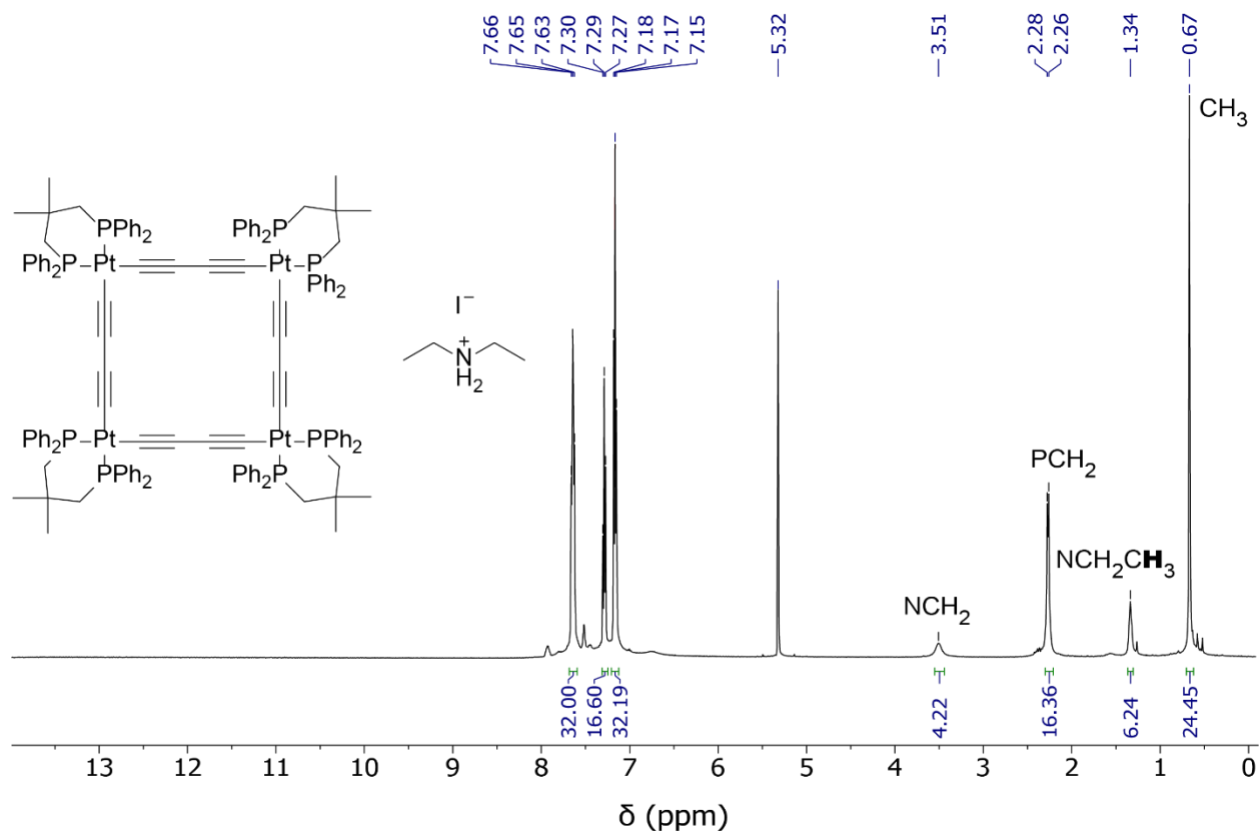

**Figure s10.** <sup>1</sup>H NMR spectrum of **1**·Ha<sup>+</sup>I<sup>-</sup> (CD<sub>2</sub>Cl<sub>2</sub>, 500 MHz).

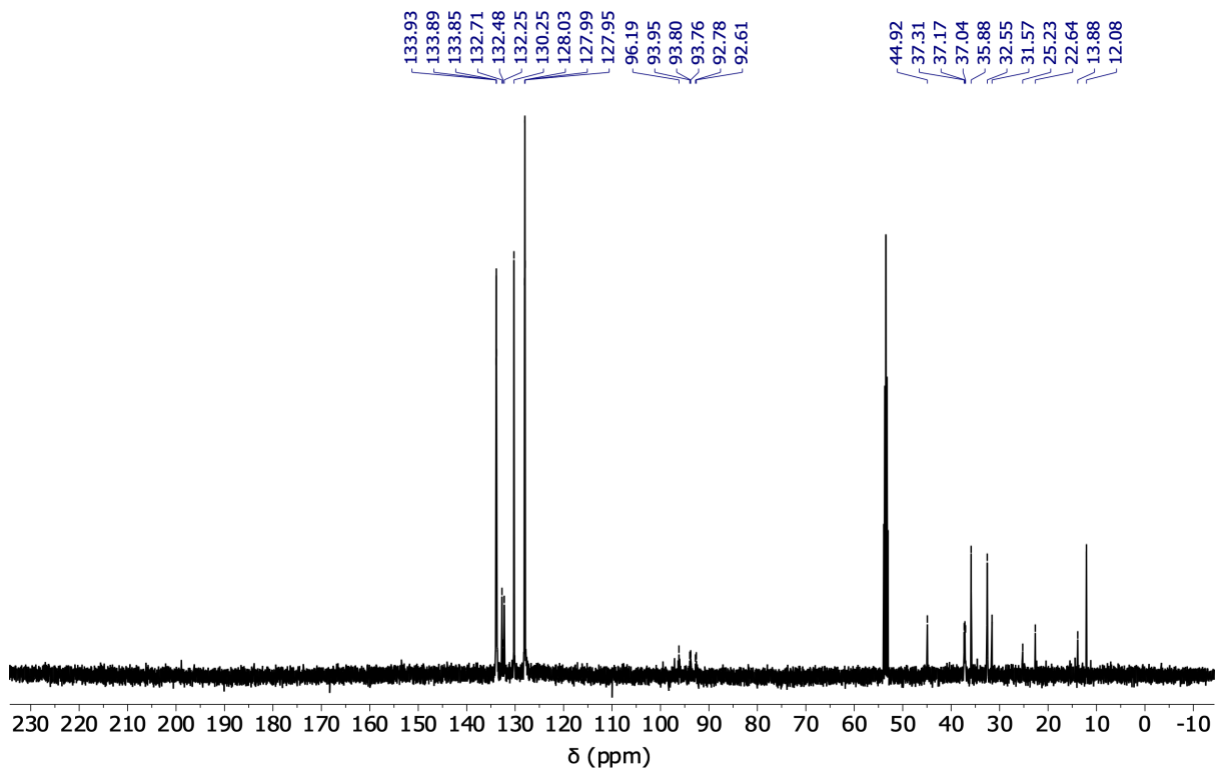

**Figure s11.** <sup>13</sup>C{<sup>1</sup>H} NMR spectrum of **1**·Ha<sup>+</sup>I<sup>-</sup> (CD<sub>2</sub>Cl<sub>2</sub>, 101 MHz).

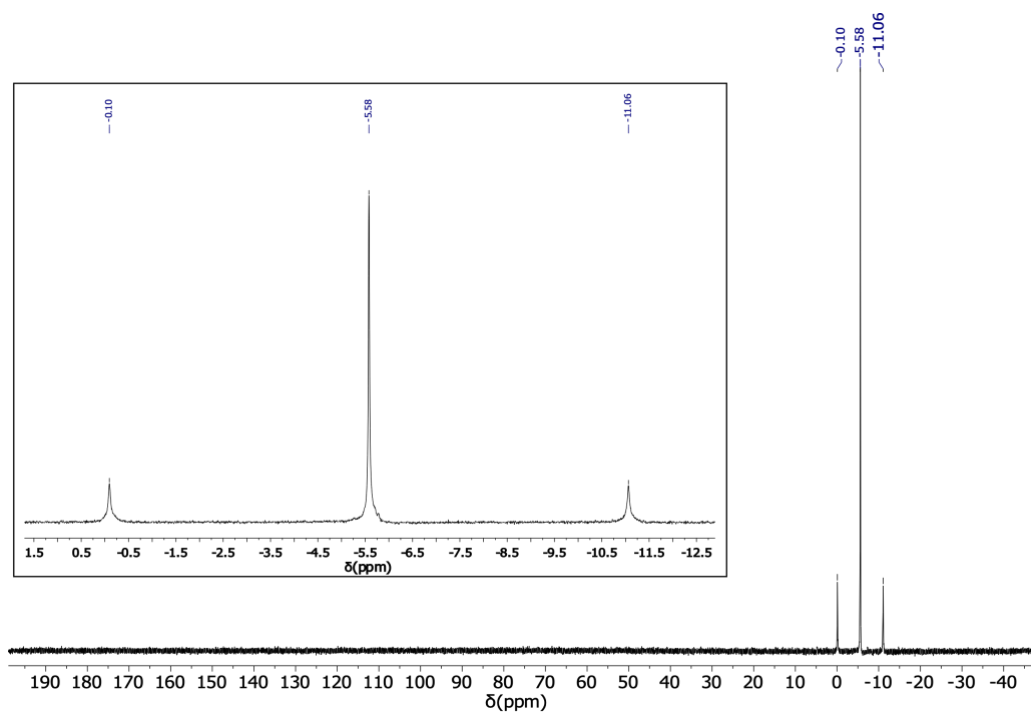

**Figure s12.**  $^{31}\text{P}\{^1\text{H}\}$  NMR spectrum of  $\mathbf{1} \cdot \text{Ha}^+\text{I}^-$  ( $\text{CD}_2\text{Cl}_2$ , 202 MHz).

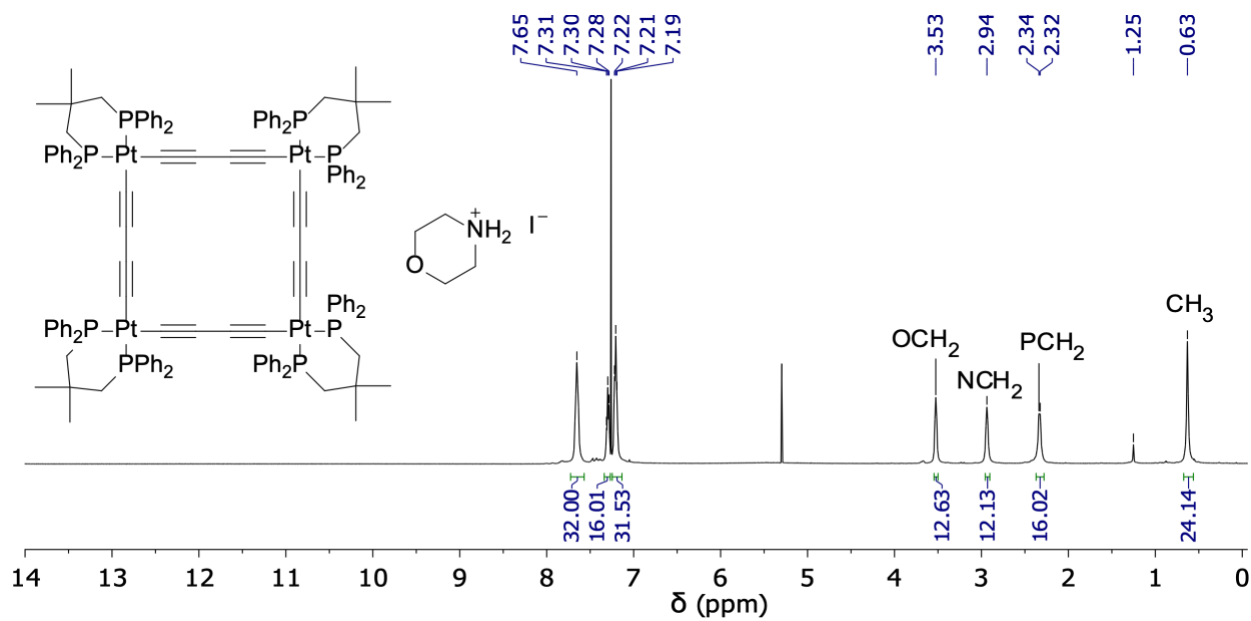

**Figure s13.**  $^1\text{H}$  NMR spectrum of  $\mathbf{1} \cdot (\text{Hc}^+\text{I}^-)_3$  ( $\text{CDCl}_3$ , 500 MHz).

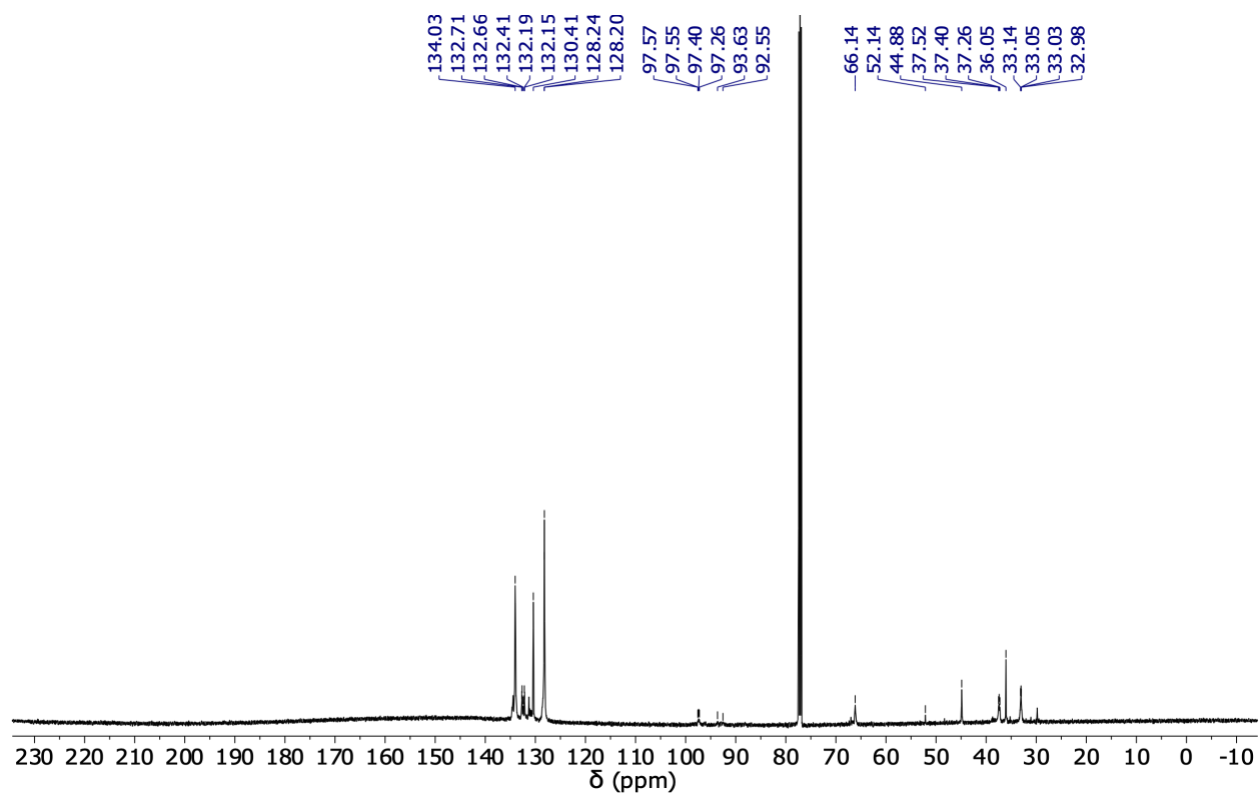

Figure s14.  $^{13}\text{C}\{^1\text{H}\}$  NMR spectrum of  $1\cdot(\text{Hc}^+\text{I}^-)_3$  ( $\text{CDCl}_3$ , 101 MHz).

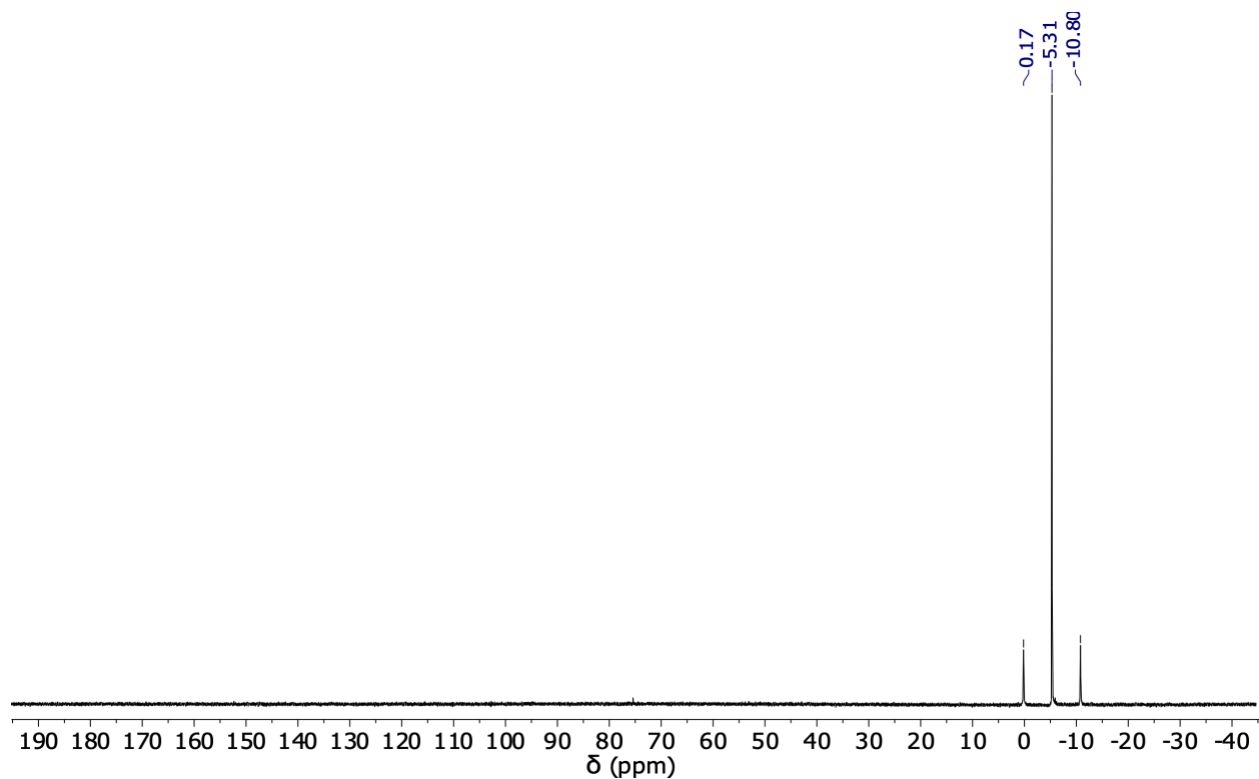

Figure s15.  $^{31}\text{P}\{^1\text{H}\}$  NMR spectrum of  $1\cdot(\text{Hc}^+\text{I}^-)_3$  ( $\text{CDCl}_3$ , 202 MHz).

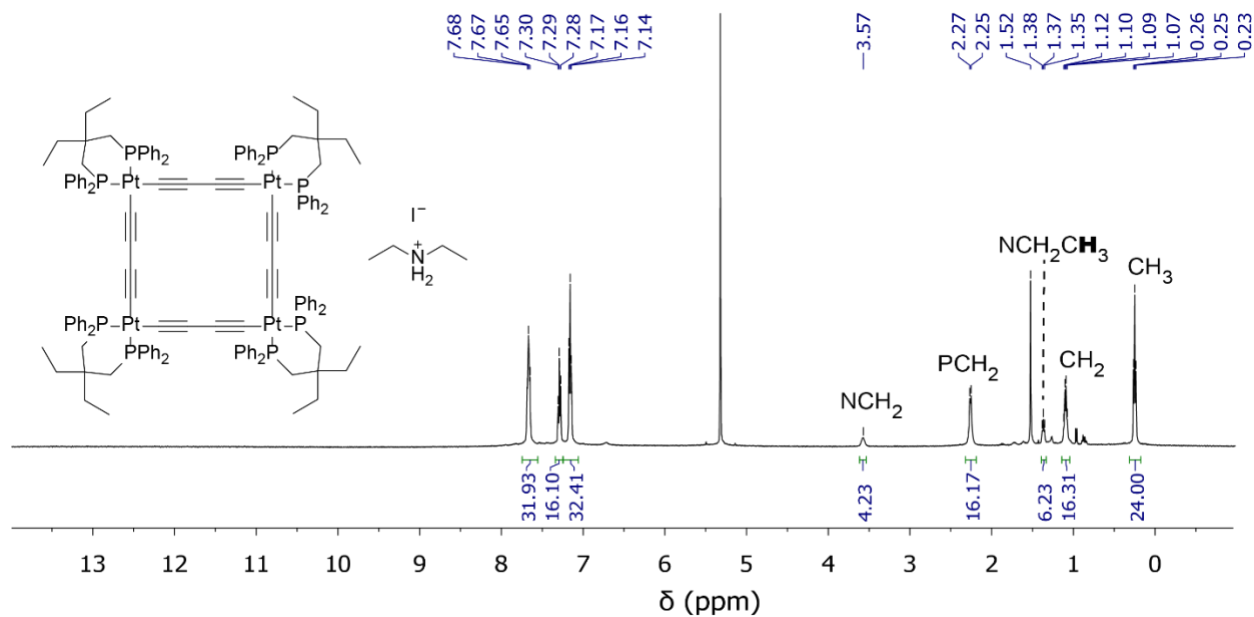

Figure s16. <sup>1</sup>H NMR spectrum of **2**·Ha<sup>+</sup>I<sup>-</sup> (CD<sub>2</sub>Cl<sub>2</sub>, 500 MHz).

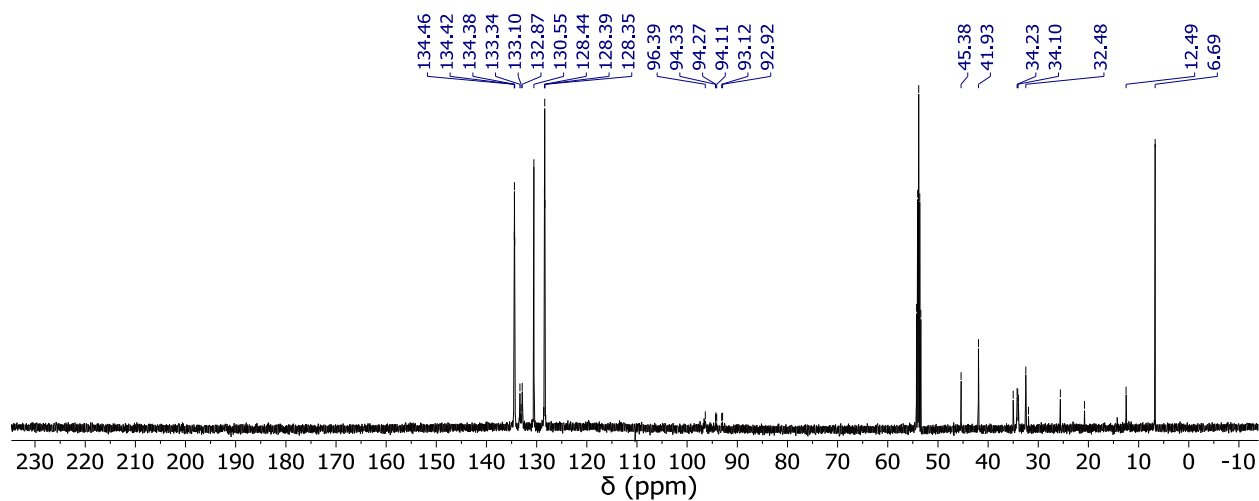

Figure s17. <sup>13</sup>C{<sup>1</sup>H} NMR spectrum of **2**·Ha<sup>+</sup>I<sup>-</sup> (CD<sub>2</sub>Cl<sub>2</sub>, 101 MHz).

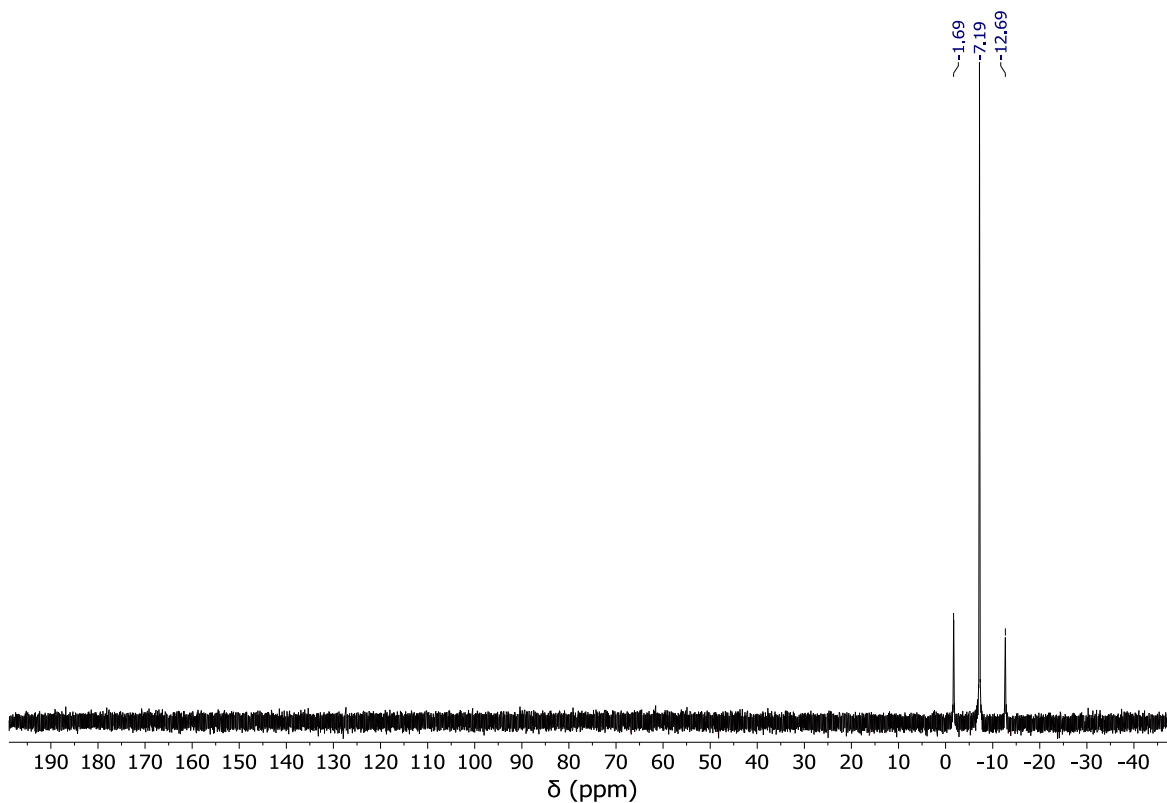

**Figure s18.**  $^{31}\text{P}\{^1\text{H}\}$  NMR spectrum of  $2 \cdot \text{Ha}^+\text{I}^-$  ( $\text{CD}_2\text{Cl}_2$ , 202 MHz).

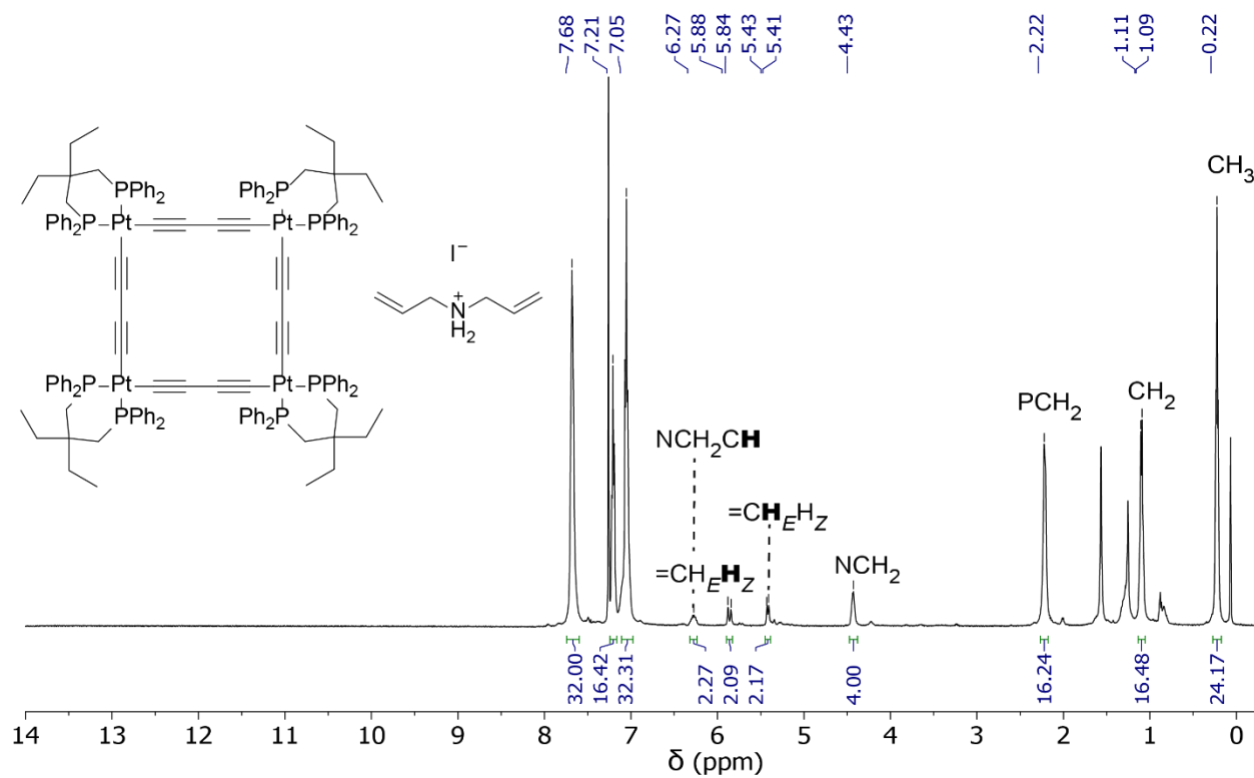

**Figure s19.**  $^1\text{H}$  NMR spectrum of  $2 \cdot \text{Hb}^+\text{I}^-$  ( $\text{CDCl}_3$ , 500 MHz).

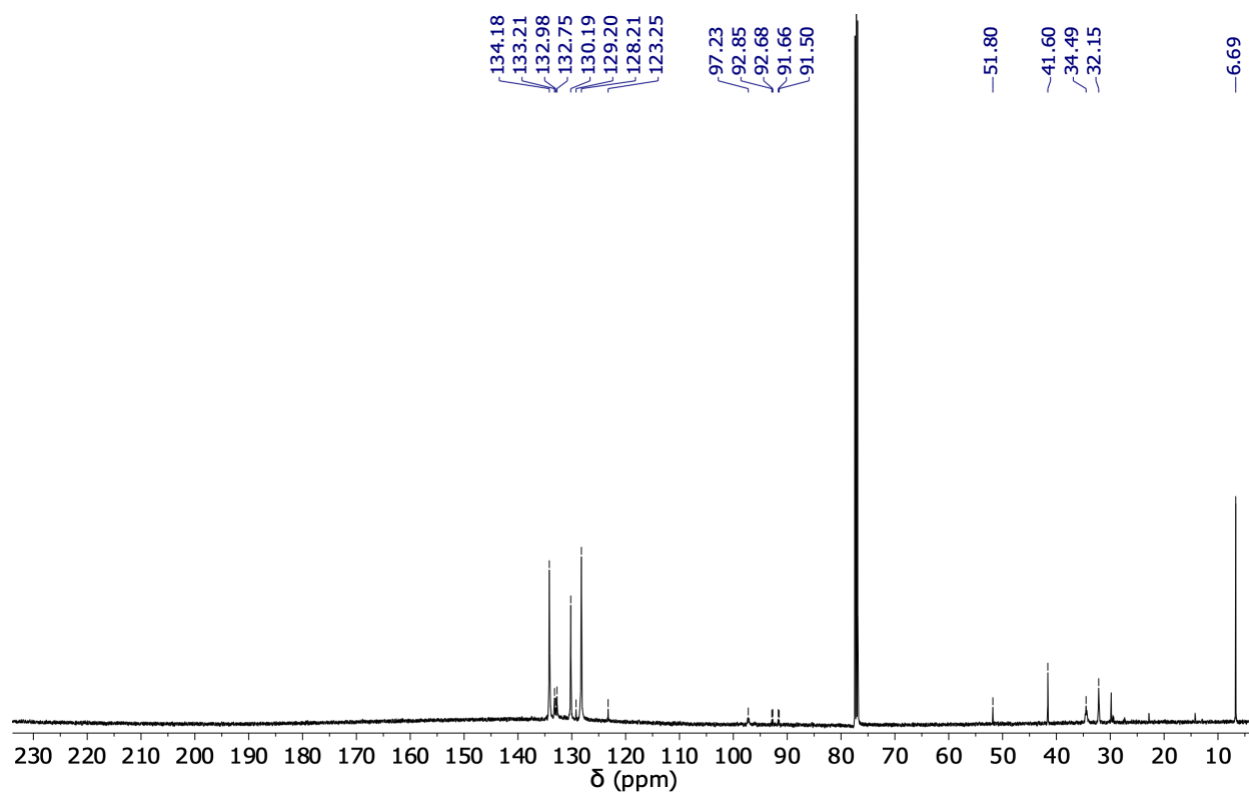

**Figure s20.**  $^{13}\text{C}\{^1\text{H}\}$  NMR spectrum of  $2\cdot\text{Hb}^+\text{T}^-$  ( $\text{CDCl}_3$ , 101 MHz).

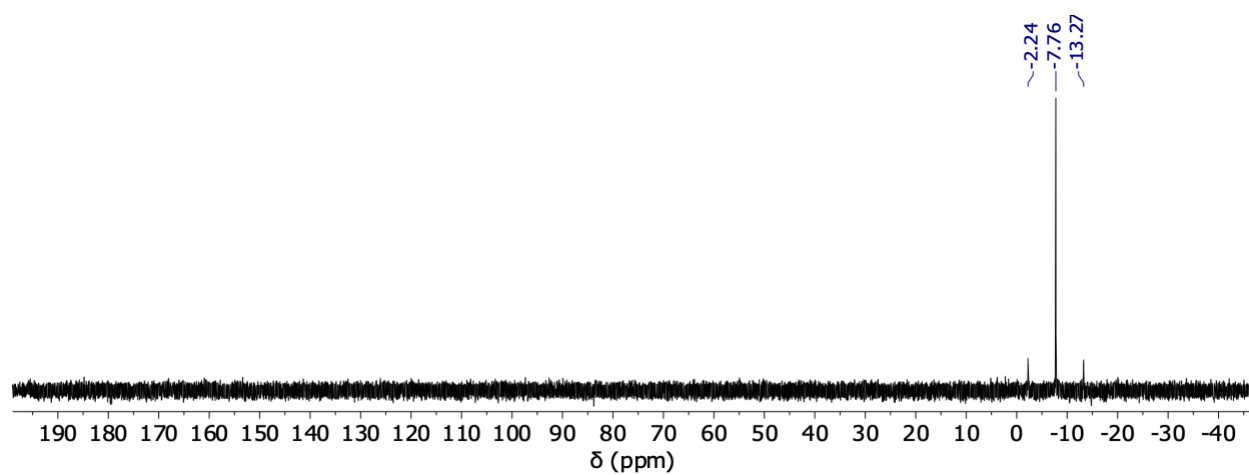

**Figure s21.**  $^{31}\text{P}\{^1\text{H}\}$  NMR spectrum of  $2\cdot\text{Hb}^+\text{T}^-$  ( $\text{CDCl}_3$ , 202 MHz).

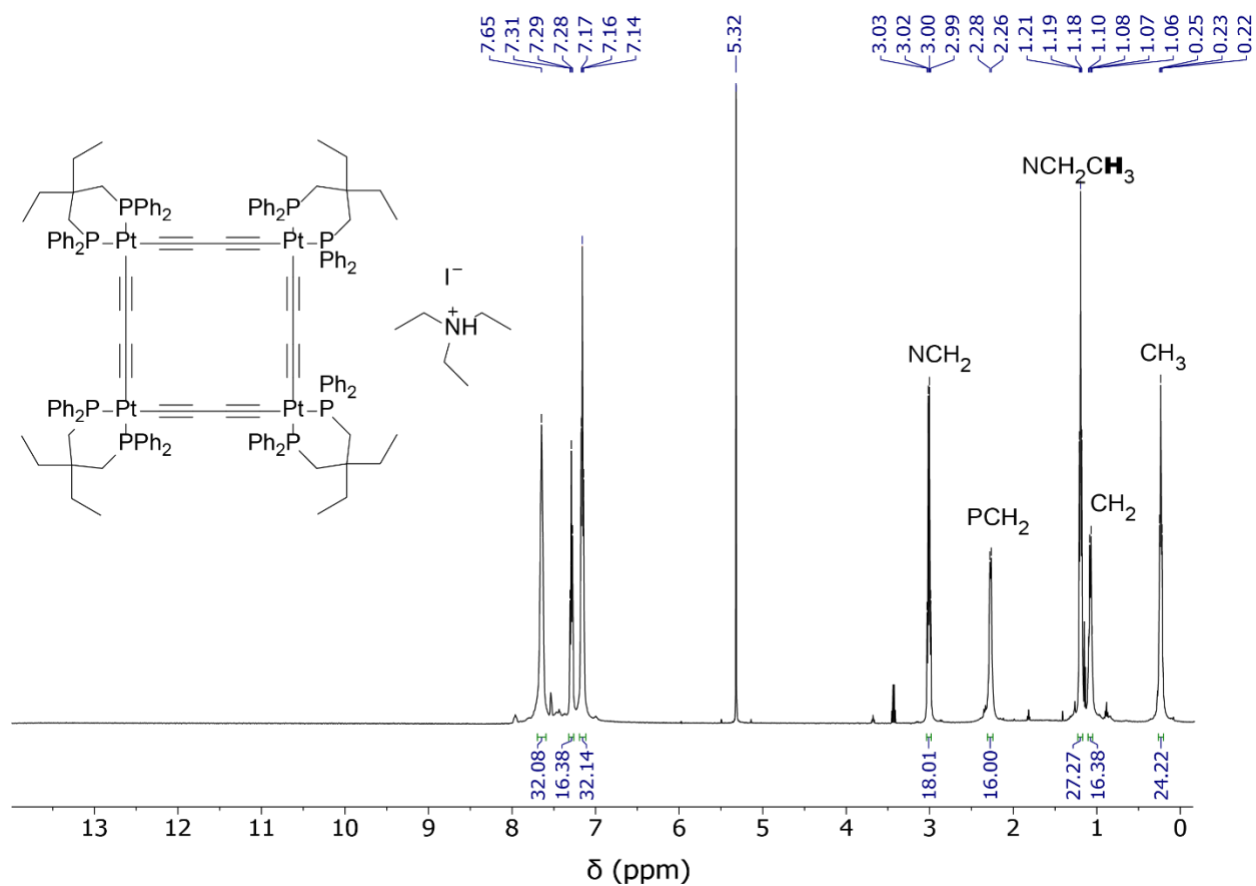

**Figure s22.**  $^1\text{H}$  NMR spectrum of  $2 \cdot (\text{Hd}^+\text{I}^-)_3$  ( $\text{CD}_2\text{Cl}_2$ , 500 MHz).

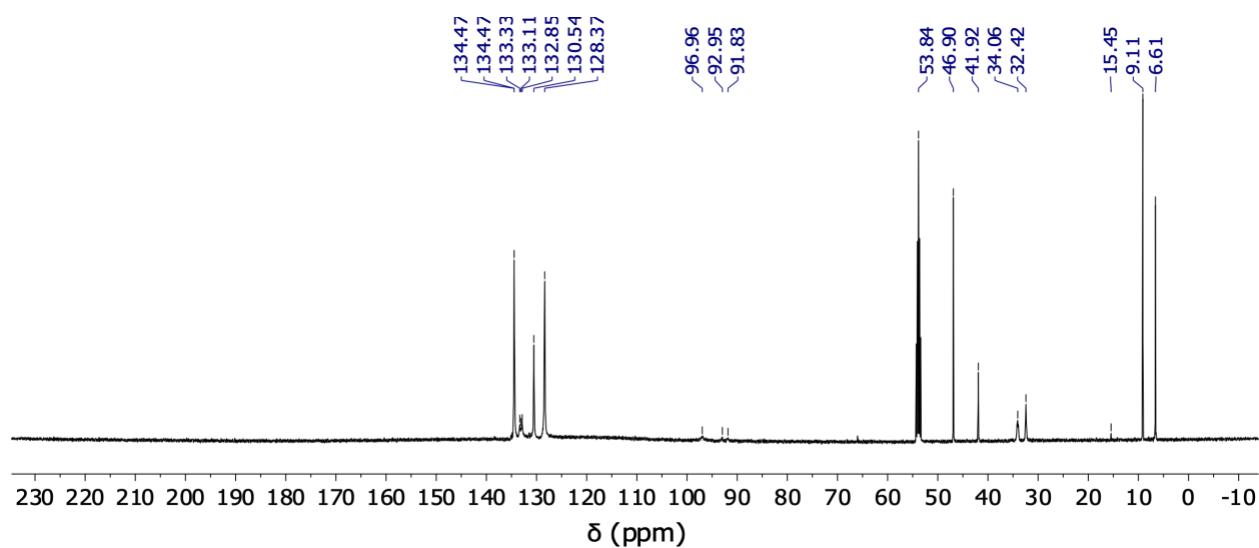

**Figure s23.**  $^{13}\text{C}\{^1\text{H}\}$  NMR spectrum of  $2 \cdot (\text{Hd}^+\text{I}^-)_3$  ( $\text{CD}_2\text{Cl}_2$ , 101 MHz).

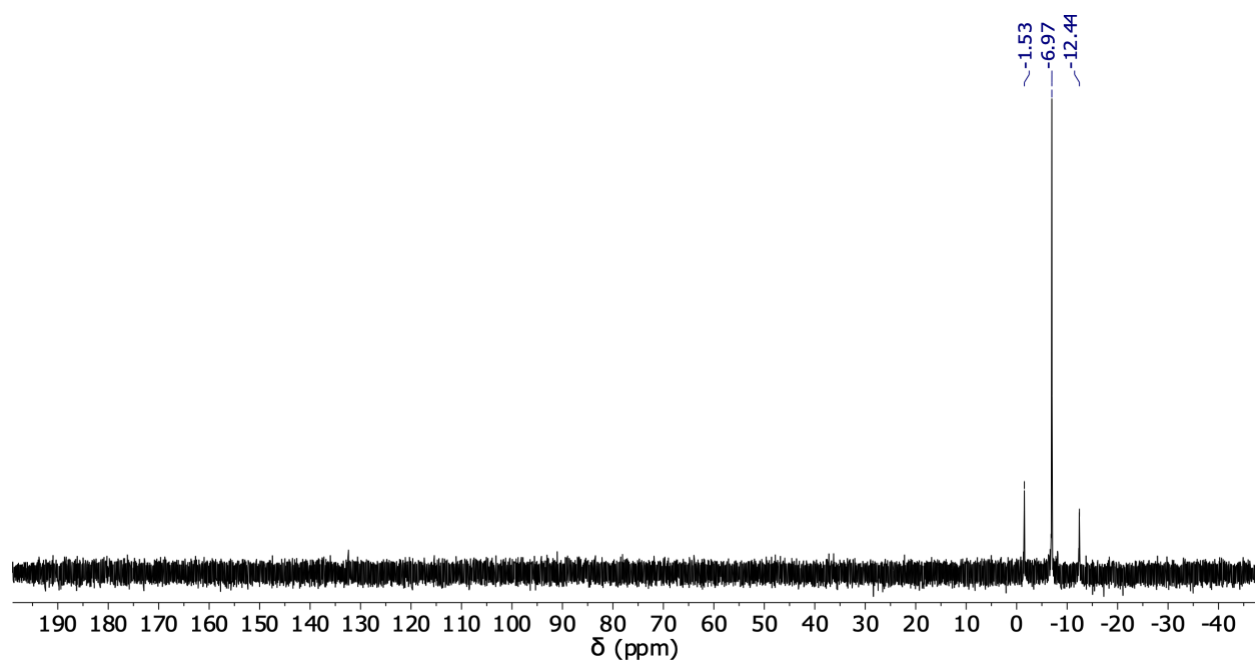

**Figure s24.**  $^{31}\text{P}\{^1\text{H}\}$  NMR spectrum of  $2\cdot(\text{Hd}^+\Gamma)_3$  ( $\text{CD}_2\text{Cl}_2$ , 202 MHz).
